# Supplementary material for: Effects of Varying Nitrogen Sources on Amino Acid Synthesis Costs in Arabidopsis thaliana under Different Light and Carbon-Source Conditions
Source: PLoS One. 2015 Feb 23;10(2):e0116536. doi: 10.1371/journal.pone.0116536 (PMC4338252; doi:10.1371/journal.pone.0116536)
Supplement: S1 Dataset — (XLS) [file pone.0116536.s005.xls]

## Sheet: AminoAcidCosts-Poolman
autotroph
heterotroph	arb	0	50	100		het : nig
Alanine	14	14	14	14		1.5	1.5	1.5	1.5
Arginine	31.5	31.5	31.5	31.5		2.5	2.5	2.5	2.5
Asparagine	24.5	24.5	24.5	24.5		2.5	2.5	2.5	2.5
Aspartate	23.5	23.5	23.5	23.5		2.5	2.5	2.5	2.5
Cysteine	15.5	15.5	15.5	15.5		1.5	1.5	1.5	1.5
Glutamate	31	31	31	31		2.5	2.5	2.5	2.5
Glutamine	31	31	31	31		2.5	2.5	2.5	2.5
Glycine	13.5	13.5	13.5	13.5		2.5	2.5	2.5	2.5
Histidine	40	40	40	40		5	5	5	5
Isoleucine	38.5	38.5	38.5	38.5		2.5	2.5	2.5	2.5
Leucine	37.5	37.5	37.5	37.5		0	0	0	0
Lysine	28	28	28	28		3	3	3	3
Methionine	41	41	41	41		5	5	5	5
Phenylalanine	46.5	46.5	46.5	46.5		0.1667	0.1667	0.1667	0.1667
Proline	31	31	31	31		2.5	2.5	2.5	2.5
Serine	15	15	15	15		1.5	1.5	1.5	1.5
Threonine	25.8333	25.8333	25.8333	25.8333		2.5	2.5	2.5	2.5
Tryptophan	56.8333	56.8333	56.8333	56.8333		0.8333	0.8333	0.8333	0.8333
Tyrosine	46.5	46.5	46.5	46.5		0.1667	0.1667	0.1667	0.1667
Valine	25	25	25	25		0	0	0	0
night	arb	0	50	100
Alanine	12.5	12.5	12.5	12.5
Arginine	29	29	29	29
Asparagine	22	22	22	22
Aspartate	21	21	21	21
Cysteine	14	14	14	14
Glutamate	28.5	28.5	28.5	28.5
Glutamine	28.5	28.5	28.5	28.5
Glycine	11	11	11	11
Histidine	35	35	35	35
Isoleucine	36	36	36	36
Leucine	37.5	37.5	37.5	37.5
Lysine	25	25	25	25
Methionine	36	36	36	36
Phenylalanine	46.6667	46.6667	46.6667	46.6667
Proline	28.5	28.5	28.5	28.5
Serine	13.5	13.5	13.5	13.5
Threonine	23.3333	23.3333	23.3333	23.3333
Tryptophan	56	56	56	56
Tyrosine	46.6667	46.6667	46.6667	46.6667
Valine	25	25	25	25

## Sheet: AminoAcidCosts-de Oliveira
autotroph	arb	0	50	100		aut : het
Alanine	24.8	24.8	33.2	41.6		6.7167	6.7167	6.075	5.3358
Arginine	56.5	56.5	90.1	123.7		13.8	13.8	11.8619	9.0585
Asparagine	27.8	27.8	44.6	61.4		6.9	6.9	6.219	4.9357
Aspartate	25.8	25.8	34.2	42.6		6.9	6.9	6.3369	5.6952
Cysteine	23.4	23.4	31.8	40.2		6.9	6.9	6.5202	5.8786
Glutamate	40	40	48.4	56.8		12.6471	12.6471	13.525	12.8833
Glutamine	41	41	57.8	74.6		12.8873	12.8873	13.1452	11.8619
Glycine	18.5	18.5	26.9	35.3		6.0833	6.0833	6.4417	5.8
Histidine	59.6	59.6	84.8	110		18.8745	18.8745	18.556	16.631
Isoleucine	59.8	59.8	68.2	76.6		13.669	13.669	13.0274	12.3857
Leucine	61.4	61.4	69.8	78.2		19.3069	19.3069	20.425	19.7833
Lysine	56.4	56.4	73.2	90		13.5905	13.5905	12.3071	11.0238
Methionine	51.1	51.1	59.5	67.9		13.8	13.8	13.1845	12.5429
Phenylalanine	80.4	80.4	88.8	97.2		23.3333	23.3333	23.294	22.6524
Proline	44.8	44.8	53.2	61.6		13.8	13.8	13.1583	12.5167
Serine	23.4	23.4	31.8	40.2		6.9	6.9	6.5202	5.8786
Threonine	32.6	32.6	41	49.4		6.9	6.9	6.494	5.8524
Tryptophan	95.6	95.6	112.4	129.2		28.6	28.6	28.6	27.3429
Tyrosine	78	78	86.4	94.8		23.3333	23.3333	23.3333	22.8357
Valine	46.2	46.2	54.6	63		13.6167	13.6167	12.975	12.3333
heterotroph	arb	0	50	100		het : nig					MIN
Alanine	18.0833	18.0833	27.125	36.2642		0.7598	0.7598	0.3799	0.6077		0.7598	0.7598	0.3799	0.6077
Arginine	42.7	42.7	78.2381	114.641		1.7485	1.7485	3.1909	6.1635		1.7485	1.7485	3.1909	2.895
Asparagine	20.9	20.9	38.381	56.4643		0.3667	0.3667	1.0814	2.6861		0.3667	0.3667	1.0814	2.2496
Aspartate	18.9	18.9	27.8631	36.9048		0.3667	0.3667	0.4016	0.8306		0.3667	0.3667	0.4016	0.8306
Cysteine	16.5	16.5	25.2798	34.3214		1.2794	1.2794	1.1614	1.3416		1.2794	1.2794	1.1614	1.3416
Glutamate	27.3529	27.3529	34.875	43.9167		0.8471	0.8471	2.6593	2.2794		0.8471	0.8471	2.6593	2.2794
Glutamine	28.1127	28.1127	44.6548	62.7381		1.0873	1.0873	2.3011	1.8524		1.0873	1.0873	2.3011	1.8524
Glycine	12.4167	12.4167	20.4583	29.5		1.1833	1.1833	2.2598	1.9318		1.1833	1.1833	2.2598	1.9318
Histidine	40.7255	40.7255	66.244	93.369		4.5588	4.5588	6.2908	8.6979		4.5588	4.5588	6.2908	7.9331
Isoleucine	46.131	46.131	55.1726	64.2143		0.6023	0.6023	0.5107	0.419		0.6023	0.6023	0.5107	0.419
Leucine	42.0931	42.0931	49.375	58.4167		0.6069	0.6069	2.8995	2.5196		0.6069	0.6069	2.8995	2.5196
Lysine	42.8095	42.8095	60.8929	78.9762		0.5238	0.5238	0.3404	0.6394		0.5238	0.5238	0.3404	0.6394
Methionine	37.3	37.3	46.3155	55.3571		1.526	1.526	1.1722	0.7924		1.526	1.526	1.1722	0.7924
Phenylalanine	57.0667	57.0667	65.506	74.5476		0.3666	0.3666	0.8773	0.7857		0.3666	0.3666	0.8773	0.7857
Proline	31	31	40.0417	49.0833		1.5196	1.5196	1.1397	0.7598		1.5196	1.5196	1.1397	0.7598
Serine	16.5	16.5	25.2798	34.3214		1.2794	1.2794	1.1614	1.3416		1.2794	1.2794	1.1614	1.3416
Threonine	25.7	25.7	34.506	43.5476		0.3667	0.3667	0.5107	0.4191		0.3667	0.3667	0.5107	0.4191
Tryptophan	67	67	83.8	101.857		0.3667	0.3667	1.4667	1.3323		0.3667	0.3667	1.4667	1.3323
Tyrosine	54.6667	54.6667	63.0667	71.9643		0.799	0.799	1.0607	0.969		0.799	0.799	1.0607	0.969
Valine	32.5833	32.5833	41.625	50.6667		1	1	0.5	0		1	1	0.5	0
night	arb	0	50	100		nig : aut
Alanine	18.8431	18.8431	27.5049	36.8719		5.9569	5.9569	5.6951	4.7281
Arginine	44.4485	44.4485	81.429	120.805		12.0515	12.0515	8.671	2.895
Asparagine	21.2667	21.2667	39.4624	59.1504		6.5333	6.5333	5.1376	2.2496
Aspartate	19.2667	19.2667	28.2647	37.7354		6.5333	6.5333	5.9353	4.8646
Cysteine	17.7794	17.7794	26.4412	35.663		5.6206	5.6206	5.3588	4.537
Glutamate	28.2	28.2	37.5343	46.1961		11.8	11.8	10.8657	10.6039
Glutamine	29.2	29.2	46.9559	64.5905		11.8	11.8	10.8441	10.0095
Glycine	13.6	13.6	22.7181	31.4318		4.9	4.9	4.1819	3.8682
Histidine	45.2843	45.2843	72.5348	102.067		14.3157	14.3157	12.2652	7.9331
Isoleucine	46.7333	46.7333	55.6833	64.6333		13.0667	13.0667	12.5167	11.9667
Leucine	42.7	42.7	52.2745	60.9363		18.7	18.7	17.5255	17.2637
Lysine	43.3333	43.3333	61.2333	79.6156		13.0667	13.0667	11.9667	10.3844
Methionine	38.826	38.826	47.4877	56.1495		12.274	12.274	12.0123	11.7505
Phenylalanine	57.4333	57.4333	66.3833	75.3333		22.9667	22.9667	22.4167	21.8667
Proline	32.5196	32.5196	41.1814	49.8431		12.2804	12.2804	12.0186	11.7569
Serine	17.7794	17.7794	26.4412	35.663		5.6206	5.6206	5.3588	4.537
Threonine	26.0667	26.0667	35.0167	43.9667		6.5333	6.5333	5.9833	5.4333
Tryptophan	67.3667	67.3667	85.2667	103.189		28.2333	28.2333	27.1333	26.0106
Tyrosine	55.4657	55.4657	64.1274	72.9333		22.5343	22.5343	22.2726	21.8667
Valine	33.5833	33.5833	42.125	50.6667		12.6167	12.6167	12.475	12.3333

## Sheet: AminoAcidCosts-Arnold
autotroph	arb	0	50	100		aut : het
Alanine	22.48	22	28	36		7.48	7	6.75	8.2
Arginine	65.6739	49.5	75.8864	107.204		5.3103	8	12.8276	19.3276
Asparagine	26.3354	26	40.9545	56.6136		7.3354	7	8.7083	10.829
Aspartate	25.16	23	30	37.9432		9.16	7	7.4769	8.6509
Cysteine	31.4379	23.5	29.5	36.7386		7.1676	6	7	8.0327
Glutamate	46.0101	37.5	43.5278	49.9886		16.9509	13.1111	13.0278	13.3117
Glutamine	46.3174	38.5	50.5909	66.25		17.0588	14	13.4217	15.5423
Glycine	25.16	23	28.3849	33.7273		0.0252	2.3333	2.4682	7.8449
Histidine	69.4596	49	67	89.7386		0.902	4.3333	7.3333	14.1308
Isoleucine	56.5	56.5	63.5	71.5		12.7353	12.7353	13.75	15.5
Leucine	65.5093	61	67.1534	74.983		21.6548	17.25	17.4034	18.983
Lysine	53	53	68	83.7159		13.5	13.5	15.8154	17.9928
Methionine	57.2795	48	54	60.8295		7.0295	8	9	10.5795
Phenylalanine	87.5652	80	86	93.3523		28.5591	22.6667	22.7843	23.9369
Proline	47.8975	43.5	49.5	56.5		17.5642	13.1667	13.6846	13.9154
Serine	26.8292	21.5	27.7045	35.5341		8.06	6	6.9545	8.211
Threonine	31.9317	31	38.5455	46.375		3.7135	5.5	7.722	9.375
Tryptophan	117.357	98.5	110.5	124.068		31.1409	26	28	29.48
Tyrosine	86.7422	77.5	83.5	90.3409		29.4089	22.6667	23.4167	24.0076
Valine	46.34	45.2778	51	58		14.84	13.7778	13.25	13.2
heterotroph	arb	0	50	100		het : nig					MIN
Alanine	15	15	21.25	27.8		0	0	0.3242	0.5077		0	0	0.3242	0.5077
Arginine	60.3636	41.5	63.0588	87.8769		8.0097	0	1.7745	1.7231		2.6994	0	1.7745	1.7231
Asparagine	19	19	32.2462	45.7846		0.6667	0.6667	0.731	0.6937		0.6667	0.6667	0.731	0.6937
Aspartate	16	16	22.5231	29.2923		0	0	0	0		0	0	0	0
Cysteine	24.2703	17.5	22.5	28.7059		1.687	0	0.0833	0.183		1.687	0	0.0833	0.183
Glutamate	29.0592	24.3889	30.5	36.6769		3.1202	0.6667	1.3632	1.0494		3.1202	0.6667	1.3632	1.0494
Glutamine	29.2586	24.5	37.1692	50.7077		2.3196	0	0.894	0		2.3196	0	0.894	0
Glycine	25.1852	20.6667	25.9167	25.8824		1.4815	4.6667	4.1667	0.7843		0.0252	2.3333	2.4682	0.7843
Histidine	68.5576	44.6667	59.6667	75.6078		7.2757	6	1	0.2255		0.902	1.6667	1	0.2255
Isoleucine	43.7647	43.7647	49.75	56		1.5686	1.5686	0.3333	0.3333		1.5686	1.5686	0.3333	0.3333
Leucine	43.8545	43.75	49.75	56		3.6872	1.3333	0.9167	0.6154		3.6872	1.3333	0.9167	0.6154
Lysine	39.5	39.5	52.1846	65.7231		0.119	0.119	0	0		0.119	0.119	0	0
Methionine	50.25	40	45	50.25		1.0833	0.25	1.4167	1.0833		1.0833	0.25	1.4167	1.0833
Phenylalanine	59.0061	57.3333	63.2157	69.4154		3.7139	0.6667	0.299	0.2462		3.7139	0.6667	0.299	0.2462
Proline	30.3333	30.3333	35.8154	42.5846		0.3334	0.3334	0.0583	0.2184		0.3334	0.3334	0.0583	0.2184
Serine	18.7692	15.5	20.75	27.3231		1.3908	0	0	0		1.3908	0	0	0
Threonine	28.2182	25.5	30.8235	37		2.7151	1.5	0.7955	0.1667		0.9984	1.5	0.7955	0.1667
Tryptophan	86.2162	72.5	82.5	94.5882		2.2005	0	0.5	0.0785		2.2005	0	0.5	0.0785
Tyrosine	57.3333	54.8333	60.0833	66.3333		2.72	0.5	0.1667	0.1667		2.72	0.5	0.1667	0.1667
Valine	31.5	31.5	37.75	44.8		1.5105	1.5105	1.1553	0		1.5105	1.5105	1.1553	0
night	arb	0	50	100		nig : aut
Alanine	15	15	21.5742	28.3077		7.48	7	6.4258	7.6923
Arginine	68.3733	41.5	64.8333	86.1538		2.6994	8	11.0531	21.0507
Asparagine	18.3333	18.3333	31.5152	45.0909		8.0021	7.6667	9.4393	11.5227
Aspartate	16	16	22.5231	29.2923		9.16	7	7.4769	8.6509
Cysteine	22.5833	17.5	22.5833	28.8889		8.8546	6	6.9167	7.8497
Glutamate	25.939	25.0556	31.8632	37.7263		20.0711	12.4444	11.6646	12.2623
Glutamine	26.939	24.5	38.0632	50.7077		19.3784	14	12.5277	15.5423
Glycine	26.6667	16	21.75	26.6667		1.5067	7	6.6349	7.0606
Histidine	75.8333	50.6667	60.6667	75.8333		6.3737	1.6667	6.3333	13.9053
Isoleucine	45.3333	45.3333	49.4167	55.6667		11.1667	11.1667	14.0833	15.8333
Leucine	47.5417	45.0833	50.6667	56.6154		17.9676	15.9167	16.4867	18.3676
Lysine	39.619	39.619	52.1846	65.7231		13.381	13.381	15.8154	17.9928
Methionine	51.3333	40.25	46.4167	51.3333		5.9462	7.75	7.5833	9.4962
Phenylalanine	62.72	58	62.9167	69.1692		24.8452	22	23.0833	24.1831
Proline	30.6667	30.6667	35.8737	42.3662		17.2308	12.8333	13.6263	14.1338
Serine	20.16	15.5	20.75	27.3231		6.6692	6	6.9545	8.211
Threonine	30.9333	27	31.619	36.8333		0.9984	4	6.9265	9.5417
Tryptophan	88.4167	72.5	83	94.6667		28.9404	26	27.5	29.4015
Tyrosine	60.0533	55.3333	60.25	66.5		26.6889	22.1667	23.25	23.8409
Valine	33.0105	33.0105	38.9053	44.8		13.3295	12.2673	12.0947	13.2

## Sheet: Mooney-AminoAcidFrequency
AA	Money %
Ala	8.42531
Arg	4.83662
Asn	3.64519
Asp	5.47598
Cys	1.54653
Gln	2.98521
Glu	6.87198
Gly	8.39673
His	2.1157
Ile	4.82599
Leu	8.53743
Lys	6.19439
Met	2.0413
Phe	4.4653
Pro	5.07721
Ser	6.32232
Thr	6.35923
Trp	1.38513
Tyr	3.47256
Val	7.01992

## Sheet: Mooney-RelevantLeafData
Spot	Protein	Accession	AGI	AGI index	Note	Volume	Summed Volume	Volume fraction		Rank	% Ala		% Arg		% Asn		% Asp		% Cys	% Cys in sample fraction	0		0		0		0	% His in sample fraction	0		0		0		0		0		0		0		0		0		0		0
88	unknown	21554971	-	#N/A		1.81	1.81		0
74	similar to late embryogenesis abundant proteins	21592483	-	#N/A		0.25	0.25		0
114	glutathione S-transferase 11 (GST class phi)	17377644	At1g02920	2		1.18	1.18	0.0120815	0.0120815	15	7.17703	0.0867093	3.34928	0.0404644	1.43541	0.0173419	6.2201	0.0751481	0	0	1.91388	0.0231225	8.61244	0.104051	6.2201	0.0751481	4.30622	0.0520256	6.2201	0.0751481	9.56938	0.115612	9.56938	0.115612	1.43541	0.0173419	6.2201	0.0751481	4.78469	0.0578062	5.74163	0.0693675	5.26316	0.0635868	0.956938	0.0115612	2.87081	0.0346837	8.13397
82	putative malate dehydrogenase, cytosolic	15219721	At1g04410	3		0.51	0.51	0.00522166	0.00522166	36	10.5422	0.0550477	3.91566	0.0204463	3.91566	0.0204463	5.42169	0.0283102	1.80723	0.00943674	2.71084	0.0141551	5.72289	0.029883	7.22892	0.037747	1.80723	0.00943674	6.0241	0.0314558	8.43373	0.0440381	6.3253	0.0330286	3.01205	0.0157279	1.80723	0.00943674	5.42169	0.0283102	8.73494	0.0456109	3.61446	0.0188735	1.20482	0.00629116	2.10843	0.0110095	10.241
84	putative 1-aminocyclopropane-1-carboxylate oxidase	13877785	At1g05010	4		0.15	0.15	0.00153578	0.00153578	73	4.64396	0.00713212	3.40557	0.00523022	4.95356	0.0076076	6.81115	0.0104604	1.54799	0.00237737	1.54799	0.00237737	10.2167	0.0156907	6.50155	0.00998497	1.85759	0.00285285	4.64396	0.00713212	9.90712	0.0152152	10.2167	0.0156907	2.78638	0.00427927	4.64396	0.00713212	4.95356	0.0076076	6.19195	0.0095095	3.71517	0.0057057	0.928793	0.00142642	3.40557	0.00523022	7.12074
116	23 kDa polypeptide of oxygen-evolving comlex	15222166	At1g06680	5		1.97	1.97	0.02017	0.02017	10	9.96493	0.200992	2.43415	0.0490968	5.21121	0.10511	4.75459	0.0958998	0.798653	0.0161088	3.87954	0.0782502	4.9829	0.100505	8.10198	0.163417	0.988767	0.0199434	2.70066	0.0544722	8.21657	0.165728	7.53164	0.151913	1.06516	0.0214842	4.79278	0.0966703	5.55411	0.112026	10.0031	0.201763	6.31456	0.127365	0.836849	0.0168792	4.37436	0.0882307	7.49345
60	hypothetical protein	15222200	At1g06770	7		0.07	0.07	0.000716699	0.000716699	83	5.09992	0.00365511	7.26477	0.00520666	6.27055	0.0044941	5.21869	0.00374023	2.07664	0.00148833	4.0616	0.00291095	7.14601	0.00512154	4.8624	0.00348487	0.800792	0.000573927	3.27783	0.00234922	8.06556	0.00578058	10.719	0.00768231	2.32771	0.00166827	2.49058	0.001785	4.65543	0.00333654	10.926	0.00783064	7.9909	0.00572707	1.12653	0.00080738	0.963659	0.000690653	4.65543
81	putative RNA binding protein	3850621	AT1G09340	9		0.29	0.29	0.00296918	0.00296918	52	6.08466	0.0180665	3.7037	0.010997	2.91005	0.00864048	5.82011	0.017281	0.793651	0.00235649	3.96825	0.0117825	6.87831	0.0204229	7.40741	0.0219939	3.1746	0.00942597	5.02646	0.0149245	10.0529	0.0298489	9.52381	0.0282779	1.5873	0.00471299	6.61376	0.0196374	5.02646	0.0149245	7.93651	0.0235649	3.1746	0.00942597	0.793651	0.00235649	3.43915	0.0102115	6.08466
97	uridylyltransferase-related	18394414	At1g16880	10		0.02	0.06	0.000614314	0.000614314	88	10.2266	0.00628237	5.10604	0.00313671	4.65113	0.00285725	7.48664	0.00459915	1.45621	0.000894569	1.56629	0.000962196	5.27845	0.00324262	5.57552	0.00342512	1.39388	0.00085628	4.2294	0.00259818	13.1868	0.00810084	4.76121	0.00292488	1.62862	0.00100048	4.18164	0.00256884	5.16837	0.003175	9.11527	0.00559963	6.27975	0.00385773	0	0	0.751983	0.000461953	7.95613
98	uridylyltransferase-related	18394414	At1g16880	10		0.04			0
117	GSH-dependent dehydroascorbate reductase 1, putative	15223576	At1g19570	12		1	1	0.0102386	0.0102386	19	6.58827	0.0674544	0.941182	0.00963634	2.82355	0.028909	6.58827	0.0674544	0.941182	0.00963634	1.88236	0.0192727	7.05886	0.0722726	5.64709	0.0578181	4.23532	0.0433635	4.70591	0.0481817	11.7648	0.120454	8.94123	0.0915453	0.941182	0.00963634	5.1765	0.0529999	7.05886	0.0722726	8.94123	0.0915453	4.23532	0.0433635	1.64651	0.0168579	2.35295	0.0240909	7.52945
25	vacuolar H+-ATPase subunit B, putative	15217907	At1g20260	14		0.06	0.06	0.000614314	0.000614314	88	6.57084	0.00403656	6.16016	0.00378427	3.90144	0.00239671	5.95483	0.00365813	0.410678	0.000252285	3.90144	0.00239671	8.00821	0.00491955	7.80287	0.00479341	1.43737	0.000882997	8.41889	0.00517184	8.82957	0.00542412	4.10678	0.00252285	3.28542	0.00201828	3.49076	0.00214442	4.92813	0.00302742	5.95483	0.00365813	6.77618	0.0041627	0.205339	0.000126142	3.90144	0.00239671	5.95483
15	putative protein disulfide isomerase precursor	15219086	At1g21750	15		0.5	0.5	0.00511928	0.00511928	38	7.28891	0.037314	2.23004	0.0114162	3.94673	0.0202044	6.87824	0.0352116	1.01235	0.0051825	3.24239	0.0165987	8.69759	0.0445254	5.36402	0.0274599	1.51996	0.00778109	5.26421	0.026949	7.08931	0.0362922	8.69759	0.0445254	0.809879	0.004146	6.88397	0.035241	4.75661	0.0243504	8.91154	0.0456207	5.05601	0.0258831	0.607409	0.0031095	2.83745	0.0145257	8.9058
96	Expressed protein	18395257	At1g23560	17		0.17	0.17	0.00174055	0.00174055	68	3.61446	0.00629116	6.62651	0.0115338	4.81928	0.00838822	4.81928	0.00838822	1.50602	0.00262132	3.91566	0.00681543	9.03614	0.0157279	5.72289	0.00996101	2.10843	0.00366984	6.0241	0.0104853	6.92771	0.0120581	9.93976	0.0173007	2.40964	0.00419411	4.51807	0.00786395	4.81928	0.00838822	6.92771	0.0120581	5.12048	0.00891248	2.71084	0.00471837	2.10843	0.00366984	6.3253
62	phosphoribulokinase/uridine kinase family protein	15222660	At1g26190	18		0.07	0.07	0.000716699	0.000716699	83	3.85757	0.00276471	6.52819	0.00467875	4.89614	0.00350906	5.93472	0.00425341	1.03858	0.000744346	5.19288	0.00372173	6.52819	0.00467875	5.48961	0.0039344	1.63205	0.00116969	7.12166	0.00510409	10.2374	0.00733713	6.08309	0.00435974	2.37389	0.00170136	3.41246	0.00244571	3.85757	0.00276471	11.5727	0.00829414	4.59941	0.00329639	0.296736	0.00021267	3.11573	0.00223304	6.23145
65	zinc finger family protein	15222739	At1g26610	19		0.07	0.07	0.000716699	0.000716699	83	3.95604	0.00283529	6.59341	0.00472549	5.27473	0.00378039	5.93407	0.00425294	2.41758	0.00173268	4.61538	0.00330784	7.47253	0.00535555	8.13187	0.0058281	4.17582	0.00299281	3.95604	0.00283529	4.61538	0.00330784	10.3297	0.00740327	3.51648	0.00252026	4.17582	0.00299281	2.63736	0.0018902	12.7473	0.00913594	2.63736	0.0018902	0.21978	0.000157516	1.53846	0.00110261	5.05495
123	unknown	15218951	At1g29500	20		0.59	0.59	0.00604075	0.00604075	34	4.44444	0.0268478	7.40741	0.0447463	2.22222	0.0134239	2.96296	0.0178985	1.48148	0.00894926	6.66667	0.0402717	6.66667	0.0402717	3.7037	0.0223731	0.740741	0.00447463	6.66667	0.0402717	10.3704	0.0626448	7.40741	0.0447463	3.7037	0.0223731	7.40741	0.0447463	3.7037	0.0223731	9.62963	0.0581702	7.40741	0.0447463	0.740741	0.00447463	2.22222	0.0134239	4.44444
109	chlorophyll a/b binding protein	16374	AT1G29910	21	same as AT1G29920	2.32	2.32	0.0237535	0.0237535	6	12.3596	0.293582	3.37079	0.0800678	4.11985	0.0978607	4.11985	0.0978607	0.374532	0.00889643	1.49813	0.0355857	5.61798	0.133446	12.3596	0.293582	1.1236	0.0266893	2.62172	0.062275	9.73783	0.231307	4.49438	0.106757	2.62172	0.062275	5.99251	0.142343	6.74157	0.160136	7.49064	0.177929	3.74532	0.0889643	2.24719	0.0533786	2.62172	0.062275	6.74157
100	elongation factor 1-beta	13124717	At1g30230	22		0.04	0.04	0.000409542	0.000409542	95	10.82	0.00443125	1.82734	0.000748373	2.64486	0.00108318	8.58392	0.00351548	1.20213	0.000492324	2.64486	0.00108318	9.59374	0.00392904	4.90509	0.00200884	1.00982	0.000413565	7.14119	0.00292462	7.14119	0.00292462	8.75208	0.00358435	1.82734	0.000748373	3.38994	0.00138833	3.87113	0.00158539	7.95871	0.00325943	4.90509	0.00200884	1.41858	0.000580969	2.64486	0.00108318	7.71812
80	annexin	1429207	AT1G35720	24		0.48	0.48	0.00491451	0.00491451	41	8.51735	0.0418586	7.25552	0.0356573	3.15457	0.0155032	8.51735	0.0418586	0.630915	0.00310064	3.47003	0.0170535	9.77918	0.0480599	4.10095	0.0201541	2.83912	0.0139529	5.36278	0.0263554	11.6719	0.0573618	6.62461	0.0325567	1.26183	0.00620127	1.89274	0.00930191	1.57729	0.00775159	5.67823	0.0279057	8.20189	0.0403083	0.946372	0.00465095	3.47003	0.0170535	5.04732
64	glyceraldehyde 3-phosphate dehydrogenase B subunit	81621	AT1G42970	25		0.92	0.92	0.00941947	0.00941947	20	10.5145	0.0990414	4.25056	0.040038	4.02685	0.0379308	6.93512	0.0653252	1.78971	0.0168581	2.01342	0.0189654	4.47427	0.0421453	8.05369	0.0758615	2.01342	0.0189654	5.59284	0.0526816	7.60626	0.071647	6.4877	0.0611107	2.01342	0.0189654	2.90828	0.0273944	4.47427	0.0421453	7.38255	0.0695397	5.81655	0.0547889	1.11857	0.0105363	1.566	0.0147509	10.962
48	hexokinase, putative	15220989	At1g47840	26		0.03	0.03	0.000307157	0.000307157	100	7.91075	0.00242984	5.27383	0.00161989	3.44828	0.00105916	5.27383	0.00161989	1.41988	0.000436125	2.23124	0.00068534	6.69371	0.00205602	9.12779	0.00280366	1.82556	0.000560732	4.66531	0.00143298	10.3448	0.00317748	6.08519	0.00186911	3.85396	0.00118377	4.0568	0.00124607	3.0426	0.000934554	7.70791	0.00236754	6.28803	0.00193141	0.608519	0.000186911	2.63692	0.000809947	7.50507
58	actin 8	21592948	AT1G49240	27		0.24	0.24	0.00245725	0.00245725	57	7.69231	0.018902	4.77454	0.0117322	2.65252	0.00651792	6.1008	0.0149912	1.06101	0.00260717	2.65252	0.00651792	7.1618	0.0175984	7.69231	0.018902	2.65252	0.00651792	7.42706	0.0182502	6.36605	0.015643	5.30504	0.0130358	4.50928	0.0110805	3.71353	0.00912508	5.03979	0.012384	6.89655	0.0169466	6.1008	0.0149912	1.06101	0.00260717	3.71353	0.00912508	7.42706
72	branched-chain amino acid aminotransferase, putative	21617893	AT1G50110	28		0.28	0.28	0.0028668	0.0028668	54	7.02247	0.020132	3.93258	0.0112739	2.80899	0.0080528	4.77528	0.0136898	1.96629	0.00563696	2.80899	0.0080528	6.74157	0.0193267	8.42697	0.0241584	1.96629	0.00563696	5.05618	0.014495	8.42697	0.0241584	6.74157	0.0193267	1.96629	0.00563696	3.08989	0.00885808	5.89888	0.0169109	7.02247	0.020132	7.86517	0.0225478	0.842697	0.00241584	3.93258	0.0112739	8.70787
16	beta-glucosidase homolog	12229686	At1g52400	29		0.23	0.23	0.00235487	0.00235487	58	5.48763	0.0129226	4.1516	0.00977648	4.27787	0.0100738	7.05783	0.0166203	1.51625	0.00357056	3.28502	0.00773579	5.07214	0.0119442	9.04353	0.0212963	4.29622	0.010117	4.49479	0.0105846	7.7075	0.0181501	7.23805	0.0170447	1.51625	0.00357056	5.72181	0.0134741	5.01819	0.0118172	5.46928	0.0128794	4.35017	0.0102441	2.43679	0.00573831	5.59554	0.0131768	6.26356
55	phosphoglycerate kinase	2129669	AT1G56190	32		0.6	0.6	0.00614314	0.00614314	32	10.3776	0.063751	2.78475	0.0171071	2.96477	0.018213	5.57803	0.0342666	0.456119	0.002802	0.912237	0.005604	6.1576	0.037827	9.62653	0.0591371	1.22604	0.00753176	5.20766	0.0319913	11.1561	0.0685331	8.29588	0.0509627	1.2449	0.00764758	3.96276	0.0243437	4.66579	0.0286626	7.39398	0.0454222	5.87298	0.0360785	0.456119	0.002802	0.912237	0.005604	10.748
128	ribulose bisphosphate carboxylase small unit, putative	13926229	AT1G67090	34	rbcS-1A	4.16	4.16	0.0425924	0.0425924	3	8.30065	0.353545	3.04739	0.129795	4.70588	0.200435	4.88562	0.20809	3.59477	0.15311	2.49183	0.106133	4.52614	0.192779	5.62908	0.239756	0.923203	0.0393214	4.61601	0.196607	6.36438	0.271074	6.27451	0.267246	4.2402	0.1806	4.61601	0.196607	7.37745	0.314223	9.31373	0.396694	8.20261	0.349369	1.84641	0.0786428	2.95752	0.125968	6.0866
113	glutathione S-transferase, putative	18411929	At1g78380	36		0.45	0.45	0.00460735	0.00460735	44	5.93607	0.0273496	4.56621	0.0210381	3.19635	0.0147267	5.93607	0.0273496	0.456621	0.00210381	3.19635	0.0147267	10.0457	0.0462839	4.10959	0.0189343	1.36986	0.00631144	7.30594	0.033661	8.6758	0.0399725	10.0457	0.0462839	1.82648	0.00841525	6.39269	0.0294534	6.39269	0.0294534	5.47945	0.0252458	2.28311	0.0105191	2.73973	0.0126229	3.65297	0.0168305	6.39269
75	phosphoglycerate kinase, putative	15219412	At1g79550	37		0.34	0.34	0.00348111	0.00348111	49	10.4738	0.0364605	2.24439	0.00781296	2.99252	0.0104173	6.23441	0.0217027	0.249377	0.000868107	0.997506	0.00347243	6.23441	0.0217027	10.2244	0.0355924	0.997506	0.00347243	4.73815	0.016494	11.7207	0.040801	8.72818	0.0303838	2.24439	0.00781296	3.49127	0.0121535	4.73815	0.016494	6.48379	0.0225708	5.23691	0.0182303	0.498753	0.00173621	1.49626	0.00520864	9.97506
53	putative RNA helicase A	20197904	At2g01130	39		0.05	0.05	0.000511928	0.000511928	91	5.84007	0.0029897	6.10961	0.00312768	3.68374	0.00188581	5.75022	0.0029437	1.97664	0.0010119	4.40252	0.00225377	6.6487	0.00340365	5.84007	0.0029897	1.88679	0.000965902	6.19946	0.00317368	11.8598	0.00607138	6.469	0.00331166	1.79695	0.000919906	4.04313	0.00206979	4.49236	0.00229977	8.62534	0.00441555	4.9416	0.00252974	1.07817	0.000551944	3.2345	0.00165583	5.12129
59	putative monogalactosyldiacylglycerol synthase	18397057	At2g11810	40		0.31	0.31	0.00317395	0.00317395	51	5.52754	0.0175441	5.86497	0.0186151	3.20917	0.0101858	4.95931	0.0157406	1.58142	0.00501934	2.856	0.0090648	7.49272	0.0237816	6.64825	0.0211012	3.30096	0.0104771	7.60025	0.0241228	7.98402	0.0253409	7.98402	0.0253409	3.79225	0.0120364	3.23977	0.0102829	4.19177	0.0133045	6.54072	0.0207599	4.25296	0.0134987	2.31836	0.00735837	3.27036	0.01038	7.3852
85	fructose-bisphosphate aldolase	14334740	AT2G21330	42		1.37	1.37	0.0140268	0.0140268	14	12.7467	0.178796	4.12256	0.0578264	3.39593	0.0476341	3.7626	0.0527774	0.722058	0.0101282	4.07743	0.0571934	6.22211	0.0872765	7.88059	0.11054	0.998471	0.0140054	4.59184	0.064409	9.45338	0.132601	5.33082	0.0747745	2.82618	0.0396424	1.91125	0.0268088	5.03749	0.07066	8.13793	0.114149	5.8216	0.0816585	1.72053	0.0241336	3.63178	0.0509424	7.60875
125	glycine-rich RNA binding protein 7	21553354	AT2G21660	45		0.19	0.19	0.00194533	0.00194533	65	5.38701	0.0104795	8.06532	0.0156897	1.79567	0.00349316	5.98556	0.0116439	0.598556	0.00116439	1.79567	0.00349316	5.38701	0.0104795	38.1254	0.0741663	0.598556	0.00116439	2.99278	0.00582194	1.79567	0.00349316	2.39423	0.00465755	1.79567	0.00349316	2.99278	0.00582194	0	0	7.75086	0.0150779	2.99278	0.00582194	1.19711	0.00232877	5.35663	0.0104204	2.99278
52	calmodulin-binding family protein	18401055	At2g26190	47		0.74	0.74	0.00757653	0.00757653	25	6.20301	0.0469973	6.39098	0.0484215	4.32331	0.0327557	2.81955	0.0213624	1.31579	0.00996912	3.38346	0.0256349	10.5263	0.079753	4.88722	0.0370282	1.69173	0.0128174	3.57143	0.027059	7.89474	0.0598147	6.76692	0.0512698	1.69173	0.0128174	4.69925	0.035604	6.39098	0.0484215	9.77444	0.0740563	6.20301	0.0469973	1.8797	0.0142416	3.00752	0.0227866	6.57895
122	putative copper/zinc superoxide dismutase	11358868	AT2G28190	48		0.39	0.39	0.00399304	0.00399304	46	8.33333	0.0332753	3.7037	0.014789	7.87037	0.0314267	4.62963	0.0184863	1.38889	0.00554589	1.38889	0.00554589	3.24074	0.0129404	11.1111	0.0443671	4.16667	0.0166377	3.7037	0.014789	9.72222	0.0388212	3.24074	0.0129404	0.925926	0.00369726	3.24074	0.0129404	6.48148	0.0258808	8.33333	0.0332753	9.72222	0.0388212	0	0	0	0	8.7963
46	unknown	15228048	At2g36880	49		0.18	0.18	0.00184294	0.00184294	67	7.94872	0.014649	3.84615	0.00708823	2.82051	0.00519804	8.20513	0.0151216	2.05128	0.00378039	2.82051	0.00519804	5.38462	0.00992353	9.23077	0.0170118	3.07692	0.00567059	6.92308	0.0127588	6.41026	0.0118137	7.4359	0.0137039	2.05128	0.00378039	3.84615	0.00708823	5.38462	0.00992353	3.58974	0.00661568	7.69231	0.0141765	0.769231	0.00141765	2.30769	0.00425294	8.20513
45	ribulose-bisphosphate carboxylase activase	22326270	At2g39730	51		0.83	2.29	0.0234463	0.0234463	7	8.15429	0.191188	5.14522	0.120636	5.50652	0.129107	6.23878	0.146276	1.24389	0.0291645	4.33295	0.101592	5.51534	0.129314	9.69882	0.227401	0.661943	0.0155201	5.0749	0.118988	7.13105	0.167197	6.54826	0.153532	4.41295	0.103467	4.11231	0.0964183	4.10704	0.096295	5.21996	0.122389	5.43619	0.127459	0.661943	0.0155201	3.38004	0.0792494	7.41761
66	ribulose-bisphosphate carboxylase activase	22326270	At2g39730	51		0.21			0
68	ribulose-bisphosphate carboxylase activase	22326270	At2g39730	51		1.25			0
17	subtilisin-like serine protease	18405184	At2g39850	54		0.26	0.26	0.00266203	0.00266203	55	6.96774	0.0185483	5.41935	0.0144265	5.03226	0.013396	6.70968	0.0178613	1.16129	0.00309138	2.06452	0.00549579	6.83871	0.0182048	6.19355	0.0164874	1.80645	0.00480882	5.93548	0.0158004	7.87097	0.0209527	8.25806	0.0219832	1.67742	0.00446533	4.64516	0.0123655	4.3871	0.0116786	7.35484	0.0195788	6.19355	0.0164874	1.80645	0.00480882	4.25806	0.0113351	5.41935
92	cysteine synthase cpACS1, chloroplast	15224351	At2g43750	55		0.04	0.04	0.000409542	0.000409542	95	10.9694	0.00449243	3.82653	0.00156713	2.80612	0.00114923	2.55102	0.00104475	1.27551	0.000522375	3.31633	0.00135818	7.90816	0.00323873	8.67347	0.00355215	0.765306	0.000313425	7.90816	0.00323873	9.18367	0.0037611	7.14286	0.0029253	2.29592	0.000940276	3.06122	0.0012537	5.35714	0.00219398	8.92857	0.00365663	5.35714	0.00219398	0.255102	0.000104475	2.04082	0.000835801	6.37755
121	putative methylenetetrahydrofolate reductase	13877629	At2g44160	57		0.07	0.07	0.000716699	0.000716699	83	7.07071	0.00506757	4.20875	0.00301641	5.05051	0.00361969	6.56566	0.0047056	1.85185	0.00132722	3.367	0.00241313	6.73401	0.00482626	6.56566	0.0047056	1.51515	0.00108591	6.22896	0.00446429	7.74411	0.00555019	6.73401	0.00482626	2.6936	0.0019305	4.54545	0.00325772	5.21886	0.00374035	6.73401	0.00482626	4.3771	0.00313707	2.18855	0.00156853	3.367	0.00241313	7.23906
61	hypothetical protein	15224845	At2g44220	58		0.02	0.02	0.000204771	0.000204771	101	4.4665	0.000914611	6.45161	0.0013211	5.7072	0.00116867	4.4665	0.000914611	1.73697	0.000355682	2.97767	0.00060974	3.72208	0.000762176	9.42928	0.00193084	2.97767	0.00060974	4.96278	0.00101623	5.7072	0.00116867	7.19603	0.00147354	2.23325	0.000457305	5.45906	0.00111786	4.4665	0.000914611	5.95533	0.00121948	8.43672	0.0017276	2.72953	0.000558929	4.71464	0.000965422	6.20347
95	putative signal recognition particle receptor, chloroplast	18406885	At2g45770	59		0.1	0.1	0.00102386	0.00102386	79	8.39047	0.00859063	5.95453	0.00609658	2.97726	0.00304829	4.46461	0.00457112	1.48735	0.00152283	1.08264	0.00110847	8.93179	0.00914486	9.60716	0.00983634	0.811981	0.000831351	5.41321	0.00554234	11.3677	0.0116389	7.57849	0.00775928	2.16528	0.00221694	5.13998	0.0052626	2.97726	0.00304829	7.30526	0.00747954	4.87189	0.00498811	0.541321	0.000554234	0.541321	0.000554234	8.39047
118	glutathione S-transferase 6 (GST class phi)	12643792	At2g47730	61		0.69	0.69	0.00706461	0.00706461	26	9.5057	0.067154	3.42205	0.0241755	2.28137	0.016117	4.94297	0.0349201	0.380228	0.00268616	4.94297	0.0349201	6.08365	0.0429786	4.56274	0.0322339	3.42205	0.0241755	5.32319	0.0376063	11.0266	0.0778987	8.36502	0.0590956	2.6616	0.0188031	4.94297	0.0349201	4.56274	0.0322339	10.6464	0.0752125	4.56274	0.0322339	1.14068	0.00805849	1.90114	0.0134308	5.32319
110	carbonic anhydrase	20259533	AT3G01500	62		1.03	1.03	0.0105457	0.0105457	18	9.23578	0.0973979	2.17943	0.0229836	2.74506	0.0289487	4.36294	0.0460103	2.10762	0.0222263	2.30288	0.0242856	7.59775	0.0801237	7.52593	0.0793664	1.17569	0.0123985	4.94874	0.052188	9.33185	0.098411	8.2837	0.0873575	1.47017	0.015504	5.04795	0.0532342	4.94466	0.0521449	9.78602	0.103201	4.70183	0.0495841	1.05224	0.0110966	3.06379	0.0323099	8.13599
42	putative cytochrome P450	18395978	At3g01900	65		0.05	0.05	0.000511928	0.000511928	91	6.04839	0.00309634	7.66129	0.00392203	3.62903	0.0018578	5.84677	0.00299313	2.01613	0.00103211	1.6129	0.00082569	7.05645	0.00361239	5.44355	0.0027867	1.6129	0.00082569	4.83871	0.00247707	10.4839	0.00536699	5.44355	0.0027867	2.21774	0.00113532	5.44355	0.0027867	5.44355	0.0027867	6.25	0.00319955	6.04839	0.00309634	1.6129	0.00082569	2.82258	0.00144496	8.46774
111	unknown	21555032	AT3G02910	66		0.77	0.77	0.00788369	0.00788369	23	5.88235	0.0463746	8.55615	0.067454	3.20856	0.0252953	4.27807	0.033727	1.60428	0.0126476	2.13904	0.0168635	10.1604	0.0801017	8.55615	0.067454	3.74332	0.0295111	3.20856	0.0252953	9.09091	0.0716699	3.20856	0.0252953	1.60428	0.0126476	3.74332	0.0295111	5.34759	0.0421588	7.48663	0.0590223	5.34759	0.0421588	0.534759	0.00421588	6.41711	0.0505905	5.88235
77	glyceraldehyde-3-phosphate dehydrogenase, cytosolic	15229231	At3g04120	67		0.48	0.57	0.00583598	0.00583598	35	8.57988	0.050072	3.84615	0.0224461	3.5503	0.0207194	7.98817	0.0466188	0.591716	0.00345324	0.887574	0.00517986	5.32544	0.0310792	7.98817	0.0466188	1.77515	0.0103597	6.21302	0.036259	6.21302	0.036259	9.1716	0.0535252	2.36686	0.013813	3.84615	0.0224461	3.25444	0.0189928	6.80473	0.0397123	6.21302	0.036259	1.47929	0.0086331	2.66272	0.0155396	11.2426
78	glyceraldehyde-3-phosphate dehydrogenase, cytosolic	81622	AT3G04120	67		0.09			0
70	adenosine kinase 1 / adenosine 5'-phosphotransferase 1	15232763	At3g09820	68		0.08	0.08	0.000819085	0.000819085	82	9.28692	0.00760678	2.34195	0.00191825	4.16699	0.00341312	5.05929	0.00414399	2.48729	0.0020373	3.71073	0.0030394	6.98541	0.00572164	8.3744	0.00685935	1.69991	0.00139237	5.11994	0.00419366	5.82647	0.00477237	7.89793	0.00646907	2.94355	0.00241102	4.49811	0.00368434	4.33255	0.00354873	5.09972	0.0041771	5.2855	0.00432927	0.932735	0.000763989	5.11994	0.00419366	8.83066
119	2-cys peroxiredoxin, chloroplast	15229806	At3g11630	70		0.49	0.49	0.00501689	0.00501689	40	6.76692	0.0339489	4.51128	0.0226326	2.25564	0.0113163	6.01504	0.0301768	0.75188	0.0037721	3.00752	0.0150884	4.88722	0.0245187	5.6391	0.0282908	1.50376	0.0075442	6.01504	0.0301768	9.02256	0.0452652	6.39098	0.0320629	1.12782	0.00565815	6.39098	0.0320629	5.26316	0.0264047	15.4135	0.0773281	4.88722	0.0245187	0.75188	0.0037721	2.25564	0.0113163	7.14286
43	eukaryotic translation initiation factor	19698881	At3g13920	71		0.17	0.17	0.00174055	0.00174055	68	5.43655	0.00946261	7.21199	0.0125529	2.5694	0.00447218	7.33572	0.0127682	1.46559	0.00255093	6.8447	0.0119136	6.29571	0.010958	6.78165	0.0118038	1.5294	0.002662	5.80741	0.0101081	9.72115	0.0169202	4.89069	0.00851252	2.99661	0.00521576	5.43968	0.00946806	3.177	0.00552975	5.19742	0.00904639	5.68454	0.00989425	0.54931	0.000956105	2.07796	0.00361681	8.98754
106	hypothetical protein	15231908	At3g14700	75		0.79	0.79	0.00808846	0.00808846	22	4.90196	0.0396493	10.2941	0.0832636	3.43137	0.0277545	7.84314	0.0634389	0.980392	0.00792986	3.43137	0.0277545	10.2941	0.0832636	6.86275	0.055509	3.43137	0.0277545	5.88235	0.0475792	4.90196	0.0396493	13.2353	0.107053	2.94118	0.0237896	1.96078	0.0158597	0.980392	0.00792986	7.84314	0.0634389	1.96078	0.0158597	0.490196	0.00396493	0.980392	0.00792986	7.35294
44	myrosinase binding protein-like	12230212	At3g16470	76		0.21	0.21	0.0021501	0.0021501	61	5.01218	0.0107767	0.667926	0.00143611	1.18803	0.00255438	6.41921	0.0138019	0.260053	0.000559139	2.41165	0.00518528	7.60724	0.0163563	14.2098	0.0305526	2.26383	0.00486746	5.8991	0.0126836	6.56703	0.0141197	9.72325	0.0209059	0.260053	0.000559139	4.41543	0.0094936	4.15537	0.00893446	6.9749	0.0149967	6.04692	0.0130015	0.667926	0.00143611	6.12357	0.0131663	9.1265
47	0	15229033	At3g17390	79		0.12	0.12	0.00122863	0.00122863	76	6.87023	0.00844095	3.81679	0.00468942	3.05344	0.00375153	7.12468	0.00875358	1.78117	0.00218839	3.05344	0.00375153	6.87023	0.00844095	9.66921	0.0118799	3.05344	0.00375153	6.87023	0.00844095	6.36132	0.00781569	7.12468	0.00875358	1.78117	0.00218839	3.56234	0.00437679	4.83461	0.00593993	5.08906	0.00625255	6.87023	0.00844095	0.763359	0.000937883	2.29008	0.00281365	9.16031
124	0	9279745	AT3G21933	#N/A	likely	0.14	0.14		0	0
12	0	15229853	At3g44050	80		0.04	0.04	0.000409542	0.000409542	95	6.49248	0.00265894	5.46318	0.0022374	5.85907	0.00239954	4.75059	0.00194557	1.18765	0.000486392	5.30483	0.00217255	11.9557	0.00489635	4.19636	0.00171859	1.97941	0.000810654	6.01742	0.00246439	9.26366	0.00379386	8.55107	0.00350202	3.48377	0.00142675	2.45447	0.00100521	1.58353	0.000648523	10.1346	0.00415055	4.27553	0.00175101	0.475059	0.000194557	0.870942	0.000356688	5.70071
89	0	22331584	At3g44310	81		0.17	0.17	0.00174055	0.00174055	68	7.28565	0.0126811	4.08065	0.00710259	2.32934	0.00405435	6.4272	0.0111869	2.39041	0.00416065	3.11726	0.00542576	5.98077	0.0104099	8.75654	0.0152412	3.50261	0.00609649	5.40273	0.00940375	7.45166	0.01297	5.59541	0.00973912	1.75131	0.00304825	4.57095	0.00795598	5.4466	0.00948011	7.00523	0.012193	5.83196	0.0101508	1.36595	0.00237751	4.37827	0.00762062	7.32951
1	0	17065070	AT3G45140	84		2.01	2.56	0.0262107	0.0262107	5	6.36161	0.166742	5.58036	0.146265	3.90625	0.102386	5.69196	0.14919	1.11607	0.029253	3.90625	0.102386	8.37054	0.219398	6.13839	0.160892	2.12054	0.0555807	6.02679	0.157966	9.82143	0.257427	5.80357	0.152116	0.892857	0.0234024	3.68304	0.096535	6.80804	0.178443	5.58036	0.146265	6.13839	0.160892	2.23214	0.058506	4.24107	0.111161	5.58036
3	0	17065070	AT3G45140	84		0.55			0	0
90	0	15232820	At3g47520	85		0.16	0.16	0.00163817	0.00163817	72	11.1663	0.0182922	2.48139	0.00406494	4.71464	0.00772338	5.21092	0.00853637	0.992556	0.00162597	2.23325	0.00365844	4.21836	0.00691039	6.45161	0.0105688	1.24069	0.00203247	5.45906	0.00894286	9.42928	0.0154468	7.94045	0.0130078	0.992556	0.00162597	3.72208	0.0060974	4.71464	0.00772338	10.67	0.0174792	6.45161	0.0105688	0	0	1.98511	0.00325195	9.92556
104	0	15232824	At3g47550	86		0.07	0.07	0.000716699	0.000716699	83	10.1204	0.00725326	5.74316	0.00411612	3.60955	0.00258696	8.0172	0.00574592	4.19948	0.00300977	3.45989	0.0024797	8.74619	0.00626839	4.29664	0.0030794	2.74561	0.00196778	4.6052	0.00330054	10.4322	0.00747673	1.90886	0.00136808	1.59294	0.00114166	2.53009	0.00181331	7.04225	0.00504717	8.13231	0.00582842	5.25175	0.00376393	1.03756	0.000743615	3.43594	0.00246254	3.09283
105	0	15230324	At3g50820	90		0.62	0.62	0.00634791	0.00634791	30	9.36556	0.0594517	2.71903	0.0172602	2.41692	0.0153424	5.43807	0.0345203	1.20846	0.00767119	3.62538	0.0230136	6.64653	0.0421915	10.574	0.0671229	0.60423	0.00383559	3.32326	0.0210958	6.94864	0.0441093	8.76133	0.0556161	0.906344	0.00575339	5.43807	0.0345203	5.13595	0.0326025	9.66767	0.0613695	7.85498	0.0498627	0.302115	0.0019178	2.41692	0.0153424	6.64653
120	0	17939851	AT3G52300	91		0.09	0.09	0.00092147	0.00092147	81	8.37724	0.00771938	5.65964	0.00521519	2.01015	0.00185229	9.2701	0.00854212	0	0	3.12744	0.00288184	10.0507	0.00926146	5.77186	0.0053186	0.297619	0.000274247	6.66472	0.00614134	4.61553	0.00425308	11.4657	0.0105653	1.71253	0.00157804	4.13251	0.00380799	3.83489	0.00353374	5.13759	0.00473413	4.95219	0.00456329	1.71253	0.00157804	4.83997	0.00445989	6.3671
56	0	21592582	AT3G52880	93		0.12	0.12	0.00122863	0.00122863	76	10.4577	0.0128486	3.10714	0.00381751	2.22504	0.00273374	5.44738	0.0066928	0.882103	0.00108378	2.44754	0.00300711	6.4526	0.00792784	10.6802	0.0131219	0.667511	0.000820121	5.21697	0.0064097	8.30828	0.0102078	8.99953	0.0110571	1.11252	0.00136687	4.89508	0.00601422	4.00506	0.00492073	6.65928	0.00818177	3.99715	0.00491101	0.774807	0.000951948	4.11236	0.00505256	9.55183
76	0	15231715	At3g52930	95		0.66	0.66	0.00675745	0.00675745	29	11.1732	0.0755022	3.91061	0.0264258	3.91061	0.0264258	4.18994	0.0283133	1.67598	0.0113253	2.7933	0.0188756	8.37989	0.0566267	8.93855	0.0604018	1.95531	0.0132129	4.46927	0.0302009	10.3352	0.0698396	7.5419	0.050964	0.837989	0.00566267	2.51397	0.016988	3.91061	0.0264258	6.14525	0.0415262	6.42458	0.0434138	0.837989	0.00566267	3.07263	0.0207631	6.98324
93	0	21554264	AT3G57260	96		0.22	0.22	0.00225248	0.00225248	60	7.37463	0.0166112	3.83481	0.00863784	5.60472	0.0126245	5.60472	0.0126245	0.294985	0.000664449	4.42478	0.00996674	5.89971	0.013289	7.66962	0.0172757	1.17994	0.0026578	4.42478	0.00996674	9.14454	0.0205979	4.12979	0.00930229	2.35988	0.00531559	4.42478	0.00996674	5.60472	0.0126245	9.43953	0.0212624	5.30973	0.0119601	0.884956	0.00199335	5.01475	0.0112956	7.37463
63	0	15233094	At3g61390	97		0.29	0.29	0.00296918	0.00296918	52	6.66543	0.0197909	7.54645	0.0224068	3.60081	0.0106915	3.33272	0.00989544	2.10687	0.00625568	4.21374	0.0125114	12.5072	0.037136	3.33272	0.00989544	2.83474	0.00841685	7.6805	0.0228048	7.64229	0.0226914	10.3427	0.0307093	2.96878	0.00881486	1.97282	0.00585766	2.56664	0.00762082	7.29746	0.0216675	4.82666	0.0143312	0.976857	0.00290047	2.98789	0.00887159	4.59678
83	0	15229384	At3g63140	99		0.14	0.14	0.0014334	0.0014334	75	8.867	0.0127099	3.94089	0.00564886	4.6798	0.00670802	5.17241	0.00741413	0.738916	0.00105916	1.23153	0.00176527	5.66502	0.00812024	6.89655	0.0098855	1.97044	0.00282443	4.4335	0.00635497	8.12808	0.0116508	7.63547	0.0109447	1.47783	0.00211832	5.66502	0.00812024	4.6798	0.00670802	12.8079	0.0183588	4.6798	0.00670802	1.23153	0.00176527	1.72414	0.00247138	8.37438
21	0	18411523	At4g01050	100		0.36	0.36	0.00368588	0.00368588	48	10.7296	0.0395481	1.93133	0.00711865	3.21888	0.0118644	4.50644	0.0166102	0	0	3.00429	0.0110735	7.08155	0.0261017	5.5794	0.020565	0.214592	0.000790962	3.21888	0.0118644	11.1588	0.04113	8.15451	0.0300565	0.858369	0.00316385	3.86266	0.0142373	9.22747	0.0340113	10.0858	0.0371752	7.72532	0.0284746	0.643777	0.00237288	1.50215	0.00553673	7.29614
112	0	15235401	At4g02520	101		0.56	0.67	0.00685983	0.00685983	27	9.43396	0.0647154	4.24528	0.0291219	2.83019	0.0194146	4.71698	0.0323577	0	0	4.71698	0.0323577	9.90566	0.0679512	4.71698	0.0323577	3.77358	0.0258862	6.13208	0.042065	9.90566	0.0679512	8.01887	0.0550081	1.41509	0.00970731	5.66038	0.0388292	4.24528	0.0291219	3.77358	0.0258862	6.13208	0.042065	0.471698	0.00323577	3.30189	0.0226504	6.60377
115	0	15235401	At4g02520	101		0.11			0	0
87	0	5708095	AT4G04640	102	atpC1	0.6	0.6	0.00614314	0.00614314	32	8.84718	0.0543495	5.36193	0.0329391	3.75335	0.0230573	5.09383	0.0312921	1.34048	0.00823477	3.48525	0.0214104	6.97051	0.0428208	4.02145	0.0247043	0.268097	0.00164695	4.82574	0.0296452	11.2601	0.069172	7.23861	0.0444677	1.60858	0.00988172	3.48525	0.0214104	4.82574	0.0296452	9.91957	0.0609373	6.16622	0.0378799	0.268097	0.00164695	2.14477	0.0131756	9.11528
4	0	15236576	At4g08720	#N/A		0.17	0.17		0	0
99	0	15236077	At4g17470	103		0.1	0.1	0.00102386	0.00102386	79	5.19481	0.00531873	2.27273	0.00232695	4.54545	0.00465389	4.54545	0.00465389	1.94805	0.00199452	3.57143	0.00365663	6.81818	0.00698084	7.14286	0.00731326	2.27273	0.00232695	6.16883	0.00631599	9.41558	0.0096402	5.84416	0.00598357	1.94805	0.00199452	6.49351	0.00664841	6.49351	0.00664841	9.09091	0.00930778	4.54545	0.00465389	0.649351	0.000664841	3.8961	0.00398905	7.14286
51	0	15237059	At4g20360	106		0.15	0.15	0.00153578	0.00153578	73	8.19328	0.0125831	5.2521	0.00806609	2.10084	0.00322644	5.67227	0.00871138	1.05042	0.00161322	2.52101	0.00387172	7.14286	0.0109699	8.19328	0.0125831	1.89076	0.00290379	6.51261	0.010002	7.98319	0.0122605	6.09244	0.00935667	2.94118	0.00451701	2.73109	0.00419437	4.62185	0.00709816	7.14286	0.0109699	7.98319	0.0122605	0.210084	0.000322644	2.73109	0.00419437	9.03361
39	0	22328910	At4g24830	107		0.04	0.04	0.000409542	0.000409542	95	8.57445	0.0035116	4.77238	0.00195449	3.18489	0.00130435	4.87359	0.00199594	1.27395	0.000521738	3.17499	0.00130029	7.30049	0.00298986	8.37202	0.0034287	1.48628	0.000608695	5.08592	0.0020829	9.10031	0.00372696	7.20918	0.00295246	2.64912	0.00108493	2.86145	0.00117188	4.1354	0.00169362	8.69546	0.00356116	5.28835	0.0021658	1.06163	0.000434782	2.85155	0.00116783	8.04858
2	0	16604476	At4g33010	109		0.61	0.61	0.00624552	0.00624552	31	9.78182	0.0610926	4.02302	0.0251259	4.32437	0.027008	5.01748	0.0313368	1.69057	0.0105585	3.03158	0.0189338	4.96625	0.0310168	7.60306	0.0474851	3.83016	0.0239213	6.41574	0.0400697	7.60005	0.0474663	5.06569	0.0316379	3.82715	0.0239025	3.77592	0.0235826	6.00591	0.03751	6.70504	0.0418765	6.45793	0.0403331	0.54243	0.00338776	2.92912	0.0182939	6.4067
18	0	15234390	At4g36390	111		0.77	0.77	0.00788369	0.00788369	23	6.5625	0.0517367	7.1875	0.056664	4.0625	0.0320275	5.78125	0.0455776	2.65625	0.0209411	2.65625	0.0209411	7.34375	0.0578958	5.46875	0.0431139	2.1875	0.0172456	5	0.0394184	8.75	0.0689823	5.3125	0.0418821	2.5	0.0197092	4.21875	0.0332593	3.90625	0.0307957	10.7812	0.084996	5.15625	0.0406503	0.78125	0.00615913	2.8125	0.0221729	6.875
5	0	15233658	At4g38070	112		0.37	0.37	0.00378827	0.00378827	47	5.81626	0.0220335	5.81626	0.0220335	5.02313	0.019029	4.82485	0.0182778	1.71844	0.00650991	5.22141	0.0197801	13.7475	0.0520793	2.97422	0.0112672	1.32188	0.00500762	4.16391	0.015774	11.6986	0.0443175	10.5089	0.0398106	2.77594	0.010516	2.64375	0.0100152	1.1236	0.00425648	7.99736	0.0302961	3.70126	0.0140213	0.528751	0.00200305	2.1811	0.00826258	6.21282
50	0	18650600	At4g38220	113		0.23	0.23	0.00235487	0.00235487	58	9.03835	0.0212841	4.4033	0.0103692	3.01278	0.00709471	5.09856	0.0120064	0.231753	0.000545747	3.12826	0.00736663	7.18433	0.0169181	7.06805	0.0166443	2.54928	0.00600321	4.63505	0.0109149	10.5443	0.0248305	6.25732	0.0147352	1.85402	0.00436597	5.09856	0.0120064	6.25732	0.0147352	8.8066	0.0207384	3.01278	0.00709471	1.62227	0.00382023	3.47629	0.0081862	6.72082
86	0	16226653	At4g38970	115		1.53	1.53	0.015665	0.015665	11	10.7658	0.168646	5.93024	0.0928972	4.22421	0.0661721	3.47044	0.0543644	0.901819	0.014127	4.23542	0.0663478	6.6728	0.104529	7.96271	0.124736	0.776191	0.012159	3.60167	0.0564201	9.88077	0.154782	5.0004	0.0783312	2.05489	0.0321899	2.43738	0.0381816	4.88037	0.076451	8.3452	0.130728	5.90221	0.0924582	1.53556	0.0240546	2.81427	0.0440855	8.60767
126	0	15235002	At4g39260	117		0.05	0.05	0.000511928	0.000511928	91	4.04279	0.00206961	8.51983	0.00436154	3.18661	0.00163131	6.99734	0.00358213	0.856176	0.0004383	2.33043	0.00119301	7.76335	0.00397427	28.3067	0.014491	0	0	4.04279	0.00206961	2.33043	0.00119301	3.18661	0.00163131	2.56853	0.0013149	5.13706	0.0026298	0	0	7.82239	0.0040045	3.18661	0.00163131	1.71235	0.000876601	3.34913	0.00171451	4.66087
94	0	18413971	At5g02590	121		0.12	0.12	0.00122863	0.00122863	76	7.66871	0.00942199	4.90798	0.00603007	3.98773	0.00489943	4.60123	0.00565319	1.22699	0.00150752	4.29448	0.00527631	9.20245	0.0113064	1.84049	0.00226128	2.76074	0.00339192	5.21472	0.00640695	10.7362	0.0131908	9.81595	0.0120601	1.53374	0.0018844	3.98773	0.00489943	7.05521	0.00866823	7.36196	0.00904511	5.52147	0.00678383	0.306748	0.000376879	3.06748	0.00376879	4.90798
27	0	18415909	At5g08670	122		0.01	0.81	0.00829323	0.00829323	21	9.89209	0.0820374	6.11511	0.050714	2.8777	0.0238654	5.39568	0.0447477	0.539568	0.00447477	3.77698	0.0313234	6.29496	0.0522056	9.71223	0.0805458	1.79856	0.0149159	6.11511	0.050714	9.71223	0.0805458	4.67626	0.0387813	1.79856	0.0149159	2.51799	0.0208822	5.39568	0.0447477	7.01439	0.058172	5.57554	0.0462392	0	0	3.05755	0.025357	7.73381
29	0	18415909	At5g08670	122		0.8			0	0
57	0	15242516	At5g09810	123		0.51	0.51	0.00522166	0.00522166	36	7.42706	0.0387816	4.77454	0.024931	2.38727	0.0124655	5.83554	0.0304713	1.06101	0.00554023	2.65252	0.0138506	7.42706	0.0387816	7.95756	0.0415517	2.38727	0.0124655	7.42706	0.0387816	7.42706	0.0387816	5.30504	0.0277011	4.24403	0.0221609	2.91777	0.0152356	5.57029	0.0290862	7.1618	0.0373965	5.83554	0.0304713	1.06101	0.00554023	3.97878	0.0207759	7.1618
103	0	18417463	At5g14740	124		0.21	0.21	0.0021501	0.0021501	61	8.49136	0.0182573	3.6752	0.00790204	3.59698	0.00773386	5.09672	0.0109584	2.93675	0.00631429	1.72127	0.0037009	7.16189	0.0153988	6.37829	0.0137139	2.29079	0.00492543	4.26834	0.00917735	8.74418	0.0188008	8.35763	0.0179697	1.53964	0.00331037	6.05671	0.0130225	4.47717	0.00962636	9.49846	0.0204226	3.41713	0.00734717	0.828378	0.00178109	3.2091	0.00689987	8.254
67	0	15241492	At5g14780	129		0.19	0.19	0.00194533	0.00194533	65	9.63542	0.018744	4.94792	0.00962531	4.6875	0.00911872	5.46875	0.0106385	1.30208	0.00253298	3.38542	0.00658574	6.51042	0.0126649	8.59375	0.0167176	2.34375	0.00455936	5.72917	0.0111451	8.59375	0.0167176	7.03125	0.0136781	3.125	0.00607914	2.86458	0.00557255	4.6875	0.00911872	4.42708	0.00861212	4.94792	0.00962531	1.04167	0.00202638	3.90625	0.00759893	6.77083
8	0	15238686	At5g17920	130		0.64	1.39	0.0142316	0.0142316	13	10.0654	0.143246	4.18301	0.0595309	3.26797	0.0465085	5.75163	0.0818549	0.784314	0.011162	3.13725	0.0446481	6.66667	0.0948773	6.53595	0.093017	1.96078	0.0279051	5.22876	0.0744136	9.54248	0.135805	7.18954	0.102319	2.35294	0.0334861	3.52941	0.0502292	4.18301	0.0595309	7.05882	0.100458	5.35948	0.0762739	1.43791	0.0204637	3.39869	0.0483688	8.36601
10	0	15238686	At5g17920	130		0.75			0	0
102	0	18419934	At5g19510	132		0.05	0.05	0.000511928	0.000511928	91	12.0536	0.00617056	0.892857	0.000457079	2.23214	0.0011427	9.82143	0.00502786	0.446429	0.000228539	1.78571	0.000914157	9.82143	0.00502786	6.25	0.00319955	0.892857	0.000457079	3.57143	0.00182831	5.80357	0.00297101	9.82143	0.00502786	2.67857	0.00137124	4.01786	0.00205685	5.35714	0.00274247	7.58929	0.00388517	4.01786	0.00205685	1.33929	0.000685618	2.23214	0.0011427	9.375
79	0	15237225	At5g23120	133		0.2	0.2	0.00204771	0.00204771	63	7.69231	0.0157516	6.94789	0.0142273	3.97022	0.00812987	4.96278	0.0101623	0.248139	0.000508117	2.72953	0.00558929	5.7072	0.0116867	9.92556	0.0203247	0.496278	0.00101623	4.96278	0.0101623	9.18114	0.0188003	3.72208	0.00762176	0.992556	0.00203247	4.21836	0.00863799	5.7072	0.0116867	11.9107	0.0243896	4.21836	0.00863799	2.72953	0.00558929	3.47395	0.00711364	6.20347
107	0	2373399	AT5G24770	134		0.42	0.42	0.00430019	0.00430019	45	6.62464	0.0284872	1.42417	0.00612419	5.23403	0.0225074	6.14387	0.0264198	1.28719	0.00553517	1.66455	0.00715789	5.33745	0.0229521	6.09216	0.0261975	1.28719	0.00553517	6.81332	0.0292986	14.2444	0.0612536	7.9971	0.0343891	0.429064	0.00184506	1.90493	0.00819159	3.94684	0.0169722	6.76161	0.0290762	6.19557	0.0266422	3.19213	0.0137268	6.76161	0.0290762	6.6582
19	0	1362007	AT5G25980	136		0.09	0.46	0.00470974	0.00470974	43	5.01052	0.0235982	5.66167	0.026665	4.09305	0.0192772	6.94477	0.032708	1.89418	0.00892109	2.97359	0.0140048	4.80683	0.0226389	8.71707	0.0410551	2.24063	0.0105528	4.94959	0.0233112	9.24633	0.0435478	5.66167	0.026665	1.83324	0.00863409	6.06905	0.0285836	5.15328	0.0242706	5.31522	0.0250333	7.02658	0.0330934	1.95512	0.0092081	6.21181	0.029256	4.23581
20	0	1362007	AT5G25980	136		0.15			0	0
22	0	13605680	At5g25980	136		0.22			0	0
9	0	15239563	At5g26000	139		0.29	7.49	0.0766868	0.0766868	2	6.32215	0.484826	4.09938	0.314368	5.18492	0.397615	7.70219	0.590656	1.91106	0.146553	2.60969	0.200129	4.52075	0.346682	8.43528	0.646875	1.81864	0.139465	4.02418	0.308602	8.03114	0.615882	6.30493	0.483505	2.02071	0.154961	6.507	0.499001	4.64762	0.356411	5.47942	0.420199	7.24008	0.555219	1.59934	0.122648	5.93524	0.455155	5.60629
13	0	16648811	At5g26000	139		7.2			0	0
108	0	18421042	At5g26770	141		0.48	0.48	0.00491451	0.00491451	41	6.60033	0.0324374	7.60799	0.0373895	2.4386	0.0119845	6.0965	0.0299613	2.02796	0.0099664	6.38869	0.0313973	11.9814	0.0588825	2.74343	0.0134826	1.2193	0.00599226	3.35308	0.0164787	11.7697	0.0578424	11.9814	0.0588825	3.04825	0.0149807	2.63761	0.0129625	0.60965	0.00299613	8.12446	0.0399277	4.46656	0.0219509	0.60965	0.00299613	0	0	6.29551
11	0	1695717	AT5G28540	144	most likely	1.13	1.13	0.0115696	0.0115696	17	7.7728	0.0899279	4.03587	0.0466933	4.4843	0.0518815	7.02541	0.081281	0.747384	0.00864691	3.73692	0.0432346	10.0149	0.115869	8.52018	0.0985748	0.896861	0.0103763	6.72646	0.0778222	7.32436	0.0847398	9.71599	0.11241	1.34529	0.0155644	3.73692	0.0432346	3.13901	0.036317	4.63378	0.0536109	5.8296	0.0674459	0.298954	0.00345877	2.09268	0.0242114	7.92227
49	0	15238559	At5g35630	145		0.32	1.16	0.0118767	0.0118767	16	7.44186	0.088385	5.11628	0.0607647	4.65116	0.0552406	4.65116	0.0552406	1.62791	0.0193342	3.72093	0.0441925	6.97674	0.0828609	9.30233	0.110481	1.62791	0.0193342	6.51163	0.0773368	7.67442	0.091147	6.04651	0.0718128	1.16279	0.0138101	2.09302	0.0248583	5.81395	0.0690507	7.90698	0.093909	5.11628	0.0607647	3.02326	0.0359064	3.25581	0.0386684	6.27907
54	0	15238559	At5g35630	145		0.84			0	0
91	0	3021305	AT5G35790	148		0.02	0.02	0.000204771	0.000204771	101	6.42361	0.00131537	7.11806	0.00145757	4.16667	0.000853213	5.38194	0.00110207	1.21528	0.000248854	2.95139	0.000604359	7.46528	0.00152867	6.42361	0.00131537	2.08333	0.000426607	5.03472	0.00103097	11.1111	0.00227524	5.90278	0.00120872	1.73611	0.000355506	5.38194	0.00110207	4.6875	0.000959865	8.15972	0.00167088	4.86111	0.000995415	0.868056	0.000177753	3.99306	0.000817663	5.03472
73	0	15240288	At5g37600	149		0.17	0.17	0.00174055	0.00174055	68	8.14607	0.0141787	4.77528	0.00831164	4.49438	0.00782272	6.17978	0.0107562	1.1236	0.00195568	2.24719	0.00391136	6.46067	0.0112452	10.9551	0.0190679	1.96629	0.00342244	8.14607	0.0141787	4.77528	0.00831164	5.05618	0.00880056	2.24719	0.00391136	2.24719	0.00391136	7.02247	0.012223	5.89888	0.0102673	4.49438	0.00782272	2.80899	0.0048892	4.77528	0.00831164	6.17978
127	0	15240901	At5g38410	150		3.88	3.88	0.0397256	0.0397256	4	7.76922	0.308637	3.69304	0.146708	2.95393	0.117347	3.88461	0.154319	2.77472	0.110228	2.21978	0.088182	6.46776	0.256936	5.91282	0.23489	0.918318	0.0364807	5.17371	0.205529	6.65933	0.264546	7.94843	0.315756	2.77472	0.110228	5.35787	0.212845	6.65933	0.264546	8.32417	0.330683	6.83854	0.271665	2.21978	0.088182	4.24798	0.168754	7.20192
38	0	15238151	At5g41670	153		0.2	0.2	0.00204771	0.00204771	63	9.85626	0.0201828	6.3655	0.0130347	4.10678	0.00840949	6.3655	0.0130347	1.23203	0.00252285	3.49076	0.00714807	6.98152	0.0142961	9.85626	0.0201828	0.616016	0.00126142	5.74949	0.0117733	9.24025	0.0189214	5.95483	0.0121938	2.46407	0.0050457	2.25873	0.00462522	3.08008	0.00630712	6.3655	0.0130347	3.90144	0.00798902	1.43737	0.00294332	3.6961	0.00756854	6.98152
41	0	1575754	AT5G48300	155	most likely	0.06	0.06	0.000614314	0.000614314	88	8.65385	0.00531617	4.61538	0.00283529	4.61538	0.00283529	6.34615	0.00389853	1.15385	0.000708823	2.69231	0.00165392	5	0.00307157	7.11538	0.00437108	1.53846	0.000945098	8.26923	0.0050799	8.07692	0.00496176	5.96154	0.00366225	2.11538	0.00129951	2.88462	0.00177206	4.80769	0.00295343	9.23077	0.00567059	5.38462	0.00330784	0.576923	0.000354412	3.84615	0.00236274	7.11538
7	0	6746592	AT5G49910	156		0.67	0.67	0.00685983	0.00685983	27	7.93872	0.0544583	4.87465	0.0334393	4.45682	0.0305731	7.38162	0.0506367	0.278552	0.00191082	3.89972	0.0267514	6.68524	0.0458596	8.21727	0.0563691	0.417827	0.00286623	5.57103	0.0382163	7.38162	0.0506367	7.24234	0.0496813	1.25348	0.00859868	3.62117	0.0248406	4.31755	0.0296177	8.6351	0.0592353	7.79944	0.0535029	0.139276	0.000955409	0.97493	0.00668786	8.91365
6	0	18423214	At5g50920	157		0.5	0.5	0.00511928	0.00511928	38	7.42734	0.0380226	8.18084	0.04188	3.01399	0.0154295	4.52099	0.0231442	0.430571	0.00220421	3.55221	0.0181847	10.7643	0.0551053	8.39612	0.0429821	1.39935	0.00716368	6.5662	0.0336142	9.58019	0.0490437	6.5662	0.0336142	2.90635	0.0148784	2.79871	0.0143274	3.65985	0.0187358	5.8127	0.0297568	5.0592	0.0258995	0.107643	0.000551053	2.04521	0.01047	7.21206
71	0	15237296	At5g52890	158		0.26	0.26	0.00266203	0.00266203	55	9.02725	0.0240308	3.50904	0.00934115	4.85867	0.0129339	7.27782	0.0193737	0.539852	0.0014371	5.93838	0.0158081	8.63764	0.0229936	6.87802	0.0183095	0.539852	0.0014371	2.959	0.00787694	6.06825	0.0161538	6.05806	0.0161267	2.69926	0.0071855	2.68908	0.00715839	7.41788	0.0197466	9.82684	0.0261593	7.93736	0.0211294	0	0	0.809778	0.00215565	6.32799
69	0	15239654	At5g54520	160		0.34	0.34	0.00348111	0.00348111	49	5.25164	0.0182815	4.814	0.0167581	4.15755	0.0144729	5.47046	0.0190433	1.96937	0.00685558	2.84464	0.0099025	4.59519	0.0159963	5.47046	0.0190433	3.06346	0.0106642	4.37637	0.0152346	6.34573	0.0220902	5.9081	0.0205667	0.875274	0.00304692	3.50109	0.0121877	8.3151	0.0289458	13.3479	0.0464656	3.93873	0.0137112	1.75055	0.00609385	4.15755	0.0144729	9.84683
26	0	18424620	At5g62690	161		0.04	0.04	0.000409542	0.000409542	95	5.33333	0.00218423	5.11111	0.00209322	4.88889	0.00200221	5.77778	0.00236624	2.66667	0.00109211	5.11111	0.00209322	8.44444	0.00345836	8	0.00327634	2	0.000819085	3.33333	0.00136514	7.77778	0.00318533	3.11111	0.00127413	4.66667	0.0019112	5.11111	0.00209322	4.22222	0.00172918	7.11111	0.0029123	6.22222	0.00254826	1.11111	0.000455047	3.77778	0.00154716	6.22222
101	0	15240013	At5g66570	162		1.45	1.45	0.0148459	0.0148459	12	9.03614	0.13415	2.71084	0.0402449	2.10843	0.0313016	5.42169	0.0804899	1.20482	0.0178866	3.61446	0.0536599	6.62651	0.0983765	10.241	0.152036	0.301205	0.00447166	2.71084	0.0402449	6.62651	0.0983765	8.43373	0.125206	0.903614	0.013415	6.0241	0.0894332	5.12048	0.0760182	10.241	0.152036	8.73494	0.129678	0.301205	0.00447166	2.40964	0.0357733	7.22892
23	0	7525018	ATCG00120	163	atpA (ArthCp007)	1.9	2.11	0.0216034	0.0216034	9	9.46746	0.204529	5.71992	0.12357	3.15582	0.0681763	3.5503	0.0766983	0.197239	0.00426102	7.49507	0.161919	7.69231	0.16618	8.08679	0.174702	0.394477	0.00852203	9.07298	0.196007	10.0592	0.217312	3.74753	0.0809593	2.16963	0.0468712	2.36686	0.0511322	3.15582	0.0681763	7.10059	0.153397	6.1144	0.132092	0	0	3.5503	0.0766983	6.90335
24	0	7525018	ATCG00120	163	atpA (ArthCp007)	0.21			0	0
30	0	7525040	ATCG00480	164	atpB (ArthCp029)	0.46	2.14	0.0219105	0.0219105	8	8.03213	0.175988	5.42169	0.118792	4.41767	0.0967934	4.61847	0.101193	0.200803	0.0043997	3.81526	0.0835943	7.22892	0.158389	9.43775	0.206786	0.803213	0.0175988	6.0241	0.131991	9.83936	0.215585	4.81928	0.105593	3.01205	0.0659955	3.61446	0.0791946	5.22088	0.114392	5.22088	0.114392	7.22892	0.158389	0	0	2.40964	0.0527964	8.63454
33	0	7525040	ATCG00480	164	atpB (ArthCp029)	1.68			0	0
14	0	1944432	ATCG00490	165	partial rbcL	0.3	32.83	0.336132	0.336132	1	8.97704	3.01747	5.63674	1.89469	3.13152	1.05261	5.42797	1.82452	1.87891	0.631563	2.50522	0.842084	7.30689	2.45608	9.81211	3.29816	3.13152	1.05261	4.38413	1.47365	8.5595	2.87712	5.01044	1.68417	1.67015	0.561389	4.5929	1.54382	5.01044	1.68417	3.9666	1.3333	6.88935	2.31573	1.67015	0.561389	3.54906	1.19295	6.88935
28	0	1944432	ATCG00490	165	partial rbcL	0.56			0	0
31	0	7525041	ATCG00490	165	rbcL (ArthCp030)	2.5			0	0
32	0	1944432	ATCG00490	165	partial rbcL	6.14			0	0
34	0	7525041	ATCG00490	165	rbcL (ArthCp030)	0.42			0	0
35	0	7525041	ATCG00490	165	rbcL (ArthCp030)	6			0	0
36	0	7525041	ATCG00490	165	discrepance to appendix	16.64			0	0
37	0	7525041	ATCG00490	165	rbcL (ArthCp030)	0.17			0	0
40	0	1944432	ATCG00490	165	partial rbcL	0.1			0	0
						TOTAL		1				8.42531		4.83662		3.64519		5.47598		1.54653		2.98521		6.87198		8.39673		2.1157		4.82599		8.53743		6.19439		2.0413		4.4653		5.07721		6.32232		6.35923		1.38513		3.47256
[truncated: 2 more columns]

## Sheet: Mooney-LeafAminoAcidComposition
	AGI	length		Ala	Arg	Asn	Asp	Cys	Gln	Glu	Gly	His	Ile	Leu	Lys	Met	Phe	Pro	Ser	Thr	Trp	Tyr	Val	Ala fraction	Arg fraction	Asn fraction	Asp fraction	Cys fraction	Gln fraction	Glu fraction	Gly fraction	His fraction	Ile fraction	Leu fraction	0	0	0	0	0	0	0	0	0	% Ala	% Arg	% Asn	% Asp	% Cys	% Gln
AT1G02920	AT1G02920.1	209		15	7	3	13	0	4	18	13	9	13	20	20	3	13	10	12	11	2	6	17	0.0717703	0.0334928	0.0143541	0.062201	0	0.0191388	0.0861244	0.062201	0.0430622	0.062201	0.0956938	0.0956938	0.0143541	0.062201	0.0478469	0.0574163	0.0526316	0.00956938	0.0287081	0.0813397	7.17703	3.34928	1.43541	6.2201	0	1.91388
AT1G04410	AT1G04410.1	332		35	13	13	18	6	9	19	24	6	20	28	21	10	6	18	29	12	4	7	34	0.105422	0.0391566	0.0391566	0.0542169	0.0180723	0.0271084	0.0572289	0.0722892	0.0180723	0.060241	0.0843373	0.063253	0.0301205	0.0180723	0.0542169	0.0873494	0.0361446	0.0120482	0.0210843	0.10241	10.5422	3.91566	3.91566	5.42169	1.80723	2.71084
AT1G05010	AT1G05010.1	323		15	11	16	22	5	5	33	21	6	15	32	33	9	15	16	20	12	3	11	23	0.0464396	0.0340557	0.0495356	0.0681115	0.0154799	0.0154799	0.102167	0.0650155	0.0185759	0.0464396	0.0990712	0.102167	0.0278638	0.0464396	0.0495356	0.0619195	0.0371517	0.00928793	0.0340557	0.0712074	4.64396	3.40557	4.95356	6.81115	1.54799	1.54799
AT1G06680	AT1G06680.1	263		32	8	13	13	3	12	13	21	4	7	18	18	2	12	10	31	14	2	11	19	0.0996493	0.0243415	0.0521121	0.0475459	0.00798653	0.0387954	0.049829	0.0810198	0.00988767	0.0270066	0.0821657	0.0753164	0.0106516	0.0479278	0.0555411	0.100031	0.0631456	0.00836849	0.0437436	0.0749345	9.96493	2.43415	5.21121	4.75459	0.798653	3.87954
AT1G06680	AT1G06680.2	219		17	4	12	10	1	7	11	18	1	6	21	18	3	11	16	18	16	2	10	17																					0	0	0	0	0	0
AT1G06770	AT1G06770.1	421		21	31	24	22	12	15	30	19	4	18	35	45	10	10	20	44	33	4	4	20	0.0509992	0.0726477	0.0627055	0.0521869	0.0207664	0.040616	0.0714601	0.048624	0.00800792	0.0327783	0.0806556	0.10719	0.0232771	0.0249058	0.0465543	0.10926	0.079909	0.0112653	0.00963659	0.0465543	5.09992	7.26477	6.27055	5.21869	2.07664	4.0616
AT1G06770	AT1G06770.2	307		16	22	21	16	4	14	22	16	2	7	24	33	7	8	14	35	25	4	3	14																					0	0	0	0	0	0
AT1G09340	AT1G09340.1	378		23	14	11	22	3	15	26	28	12	19	38	36	6	25	19	30	12	3	13	23	0.0608466	0.037037	0.0291005	0.0582011	0.00793651	0.0396825	0.0687831	0.0740741	0.031746	0.0502646	0.100529	0.0952381	0.015873	0.0661376	0.0502646	0.0793651	0.031746	0.00793651	0.0343915	0.0608466	6.08466	3.7037	2.91005	5.82011	0.793651	3.96825
AT1G16880	AT1G16880.1	290		28	16	12	23	3	5	17	16	4	15	37	14	4	12	15	27	16	0	3	23	0.102266	0.0510604	0.0465113	0.0748664	0.0145621	0.0156629	0.0527845	0.0557552	0.0139388	0.042294	0.131868	0.0476121	0.0162862	0.0418164	0.0516837	0.0911527	0.0627975	0	0.00751983	0.0795613	10.2266	5.10604	4.65113	7.48664	1.45621	1.56629
AT1G16880	AT1G16880.2	213		23	10	11	15	4	3	10	12	3	7	29	10	4	9	11	19	15	0	1	17																					0	0	0	0	0	0
AT1G19570	AT1G19570.1	213		14	2	6	14	2	4	15	12	9	10	25	19	2	11	15	19	9	4	5	16	0.0658827	0.00941182	0.0282355	0.0658827	0.00941182	0.0188236	0.0705886	0.0564709	0.0423532	0.0470591	0.117648	0.0894123	0.00941182	0.051765	0.0705886	0.0894123	0.0423532	0.0164651	0.0235295	0.0752945	6.58827	0.941182	2.82355	6.58827	0.941182	1.88236
AT1G19570	AT1G19570.2	212		14	2	6	14	2	4	15	12	9	10	25	19	2	11	15	19	9	3	5	16																					0	0	0	0	0	0
AT1G20260	AT1G20260.1	487		32	30	19	29	2	19	39	38	7	41	43	20	16	17	24	29	33	1	19	29	0.0657084	0.0616016	0.0390144	0.0595483	0.00410678	0.0390144	0.0800821	0.0780287	0.0143737	0.0841889	0.0882957	0.0410678	0.0328542	0.0349076	0.0492813	0.0595483	0.0677618	0.00205339	0.0390144	0.0595483	6.57084	6.16016	3.90144	5.95483	0.410678	3.90144
AT1G21750	AT1G21750.1	501		36	10	20	36	5	15	46	27	7	26	34	46	4	34	24	43	27	3	13	45	0.0728891	0.0223004	0.0394673	0.0687824	0.0101235	0.0324239	0.0869759	0.0536402	0.0151996	0.0526421	0.0708931	0.0869759	0.00809879	0.0688397	0.0475661	0.0891154	0.0505601	0.00607409	0.0283745	0.089058	7.28891	2.23004	3.94673	6.87824	1.01235	3.24239
AT1G21750	AT1G21750.2	487		36	12	19	32	5	17	40	26	8	26	36	40	4	34	23	45	23	3	15	43																					0	0	0	0	0	0
AT1G23560	AT1G23560.1	332		12	22	16	16	5	13	30	19	7	20	23	33	8	15	16	23	17	9	7	21	0.0361446	0.0662651	0.0481928	0.0481928	0.0150602	0.0391566	0.0903614	0.0572289	0.0210843	0.060241	0.0692771	0.0993976	0.0240964	0.0451807	0.0481928	0.0692771	0.0512048	0.0271084	0.0210843	0.063253	3.61446	6.62651	4.81928	4.81928	1.50602	3.91566
AT1G26190	AT1G26190.1	674		26	44	33	40	7	35	44	37	11	48	69	41	16	23	26	78	31	2	21	42	0.0385757	0.0652819	0.0489614	0.0593472	0.0103858	0.0519288	0.0652819	0.0548961	0.0163205	0.0712166	0.102374	0.0608309	0.0237389	0.0341246	0.0385757	0.115727	0.0459941	0.00296736	0.0311573	0.0623145	3.85757	6.52819	4.89614	5.93472	1.03858	5.19288
AT1G26610	AT1G26610.1	455		18	30	24	27	11	21	34	37	19	18	21	47	16	19	12	58	12	1	7	23	0.0395604	0.0659341	0.0527473	0.0593407	0.0241758	0.0461538	0.0747253	0.0813187	0.0417582	0.0395604	0.0461538	0.103297	0.0351648	0.0417582	0.0263736	0.127473	0.0263736	0.0021978	0.0153846	0.0505495	3.95604	6.59341	5.27473	5.93407	2.41758	4.61538
AT1G29500	AT1G29500.1	135		6	10	3	4	2	9	9	5	1	9	14	10	5	10	5	13	10	1	3	6	0.0444444	0.0740741	0.0222222	0.0296296	0.0148148	0.0666667	0.0666667	0.037037	0.00740741	0.0666667	0.103704	0.0740741	0.037037	0.0740741	0.037037	0.0962963	0.0740741	0.00740741	0.0222222	0.0444444	4.44444	7.40741	2.22222	2.96296	1.48148	6.66667
AT1G29910	AT1G29910.1	267		33	9	11	11	1	4	15	33	3	7	26	12	7	16	18	20	10	6	7	18	0.123596	0.0337079	0.0411985	0.0411985	0.00374532	0.0149813	0.0561798	0.123596	0.011236	0.0262172	0.0973783	0.0449438	0.0262172	0.0599251	0.0674157	0.0749064	0.0374532	0.0224719	0.0262172	0.0674157	12.3596	3.37079	4.11985	4.11985	0.374532	1.49813
AT1G30230	AT1G30230.1	231		26	4	6	21	2	6	23	12	2	17	17	20	4	5	9	19	12	3	6	17	0.1082	0.0182734	0.0264486	0.0858392	0.0120213	0.0264486	0.0959374	0.0490509	0.0100982	0.0714119	0.0714119	0.0875208	0.0182734	0.0338994	0.0387113	0.0795871	0.0490509	0.0141858	0.0264486	0.0771812	10.82	1.82734	2.64486	8.58392	1.20213	2.64486
AT1G30230	AT1G30230.2	260		27	5	7	21	4	7	24	12	3	18	18	23	5	12	10	20	12	4	7	21																					0	0	0	0	0	0
AT1G35720	AT1G35720.1	317		27	23	10	27	2	11	31	13	9	17	37	21	4	6	5	18	26	3	11	16	0.0851735	0.0725552	0.0315457	0.0851735	0.00630915	0.0347003	0.0977918	0.0410095	0.0283912	0.0536278	0.116719	0.0662461	0.0126183	0.0189274	0.0157729	0.0567823	0.0820189	0.00946372	0.0347003	0.0504732	8.51735	7.25552	3.15457	8.51735	0.630915	3.47003
AT1G42970	AT1G42970.1	447		47	19	18	31	8	9	20	36	9	25	34	29	9	13	20	33	26	5	7	49	0.105145	0.0425056	0.0402685	0.0693512	0.0178971	0.0201342	0.0447427	0.0805369	0.0201342	0.0559284	0.0760626	0.064877	0.0201342	0.0290828	0.0447427	0.0738255	0.0581655	0.0111857	0.01566	0.10962	10.5145	4.25056	4.02685	6.93512	1.78971	2.01342
AT1G47840	AT1G47840.1	493		39	26	17	26	7	11	33	45	9	23	51	30	19	20	15	38	31	3	13	37	0.0791075	0.0527383	0.0344828	0.0527383	0.0141988	0.0223124	0.0669371	0.0912779	0.0182556	0.0466531	0.103448	0.0608519	0.0385396	0.040568	0.030426	0.0770791	0.0628803	0.00608519	0.0263692	0.0750507	7.91075	5.27383	3.44828	5.27383	1.41988	2.23124
AT1G49240	AT1G49240.1	377		29	18	10	23	4	10	27	29	10	28	24	20	17	14	19	26	23	4	14	28	0.0769231	0.0477454	0.0265252	0.061008	0.0106101	0.0265252	0.071618	0.0769231	0.0265252	0.0742706	0.0636605	0.0530504	0.0450928	0.0371353	0.0503979	0.0689655	0.061008	0.0106101	0.0371353	0.0742706	7.69231	4.77454	2.65252	6.1008	1.06101	2.65252
AT1G50110	AT1G50110.1	356		25	14	10	17	7	10	24	30	7	18	30	24	7	11	21	25	28	3	14	31	0.0702247	0.0393258	0.0280899	0.0477528	0.0196629	0.0280899	0.0674157	0.0842697	0.0196629	0.0505618	0.0842697	0.0674157	0.0196629	0.0308989	0.0589888	0.0702247	0.0786517	0.00842697	0.0393258	0.0870787	7.02247	3.93258	2.80899	4.77528	1.96629	2.80899
AT1G52400	AT1G52400.1	528		28	22	23	37	8	18	27	47	22	23	41	39	8	31	26	29	23	13	30	33	0.0548763	0.041516	0.0427787	0.0705783	0.0151625	0.0328502	0.0507214	0.0904353	0.0429622	0.0449479	0.077075	0.0723805	0.0151625	0.0572181	0.0501819	0.0546928	0.0435017	0.0243679	0.0559554	0.0626356	5.48763	4.1516	4.27787	7.05783	1.51625	3.28502
AT1G52400	AT1G52400.2	461		27	19	19	33	7	14	23	43	21	22	35	32	7	25	24	25	20	11	25	29																					0	0	0	0	0	0
AT1G52400	AT1G52400.3	528		28	22	23	37	8	18	27	47	22	23	41	39	8	31	26	29	23	13	30	33																					0	0	0	0	0	0
AT1G56190	AT1G56190.1	478		52	16	13	25	2	4	27	46	7	25	50	38	6	19	21	40	29	2	4	52	0.103776	0.0278475	0.0296477	0.0557803	0.00456119	0.00912237	0.061576	0.0962653	0.0122604	0.0520766	0.111561	0.0829588	0.012449	0.0396276	0.0466579	0.0739398	0.0587298	0.00456119	0.00912237	0.10748	10.3776	2.78475	2.96477	5.57803	0.456119	0.912237
AT1G56190	AT1G56190.2	405		40	9	13	24	2	4	27	39	4	21	48	35	5	16	20	26	23	2	4	43																					0	0	0	0	0	0
AT1G67090	AT1G67090.1	180		14	7	9	7	5	5	11	11	2	10	11	12	6	10	12	15	11	4	8	10	0.0830065	0.0304739	0.0470588	0.0488562	0.0359477	0.0249183	0.0452614	0.0562908	0.00923203	0.0461601	0.0636438	0.0627451	0.042402	0.0461601	0.0737745	0.0931373	0.0820261	0.0184641	0.0295752	0.060866	8.30065	3.04739	4.70588	4.88562	3.59477	2.49183
AT1G67090	AT1G67090.2	136		12	3	6	8	6	3	4	7	1	5	9	8	7	5	11	14	14	2	2	9																					0	0	0	0	0	0
AT1G78380	AT1G78380.1	219		13	10	7	13	1	7	22	9	3	16	19	22	4	14	14	12	5	6	8	14	0.0593607	0.0456621	0.0319635	0.0593607	0.00456621	0.0319635	0.100457	0.0410959	0.0136986	0.0730594	0.086758	0.100457	0.0182648	0.0639269	0.0639269	0.0547945	0.0228311	0.0273973	0.0365297	0.0639269	5.93607	4.56621	3.19635	5.93607	0.456621	3.19635
AT1G79550	AT1G79550.1	401		42	9	12	25	1	4	25	41	4	19	47	35	9	14	19	26	21	2	6	40	0.104738	0.0224439	0.0299252	0.0623441	0.00249377	0.00997506	0.0623441	0.102244	0.00997506	0.0473815	0.117207	0.0872818	0.0224439	0.0349127	0.0473815	0.0648379	0.0523691	0.00498753	0.0149626	0.0997506	10.4738	2.24439	2.99252	6.23441	0.249377	0.997506
AT1G79550	AT1G79550.2	401		42	9	12	25	1	4	25	41	4	19	47	35	9	14	19	26	21	2	6	40																					0	0	0	0	0	0
AT2G01130	AT2G01130.1	1113		65	68	41	64	22	49	74	65	21	69	132	72	20	45	50	96	55	12	36	57	0.0584007	0.0610961	0.0368374	0.0575022	0.0197664	0.0440252	0.066487	0.0584007	0.0188679	0.0619946	0.118598	0.06469	0.0179695	0.0404313	0.0449236	0.0862534	0.049416	0.0107817	0.032345	0.0512129	5.84007	6.10961	3.68374	5.75022	1.97664	4.40252
AT2G11810	AT2G11810.1	465		27	25	17	23	7	15	35	31	14	36	37	37	16	16	21	30	19	10	15	34	0.0552754	0.0586497	0.0320917	0.0495931	0.0158142	0.02856	0.0749272	0.0664825	0.0330096	0.0760025	0.0798402	0.0798402	0.0379225	0.0323977	0.0419177	0.0654072	0.0425296	0.0231836	0.0327036	0.073852	5.52754	5.86497	3.20917	4.95931	1.58142	2.856
AT2G11810	AT2G11810.2	362		19	23	10	18	6	9	27	24	13	27	29	29	15	11	14	24	16	9	12	27																					0	0	0	0	0	0
AT2G21330	AT2G21330.1	399		51	16	15	14	3	17	26	32	4	17	38	22	11	8	19	32	23	7	15	29	0.127467	0.0412256	0.0339593	0.037626	0.00722058	0.0407743	0.0622211	0.0788059	0.00998471	0.0459184	0.0945338	0.0533082	0.0282618	0.0191125	0.0503749	0.0813793	0.058216	0.0172053	0.0363178	0.0760875	12.7467	4.12256	3.39593	3.7626	0.722058	4.07743
AT2G21330	AT2G21330.2	311		40	14	8	13	2	12	17	23	3	16	29	15	9	6	17	27	18	5	11	26																					0	0	0	0	0	0
AT2G21330	AT2G21330.3	389		49	15	15	14	3	16	26	32	4	17	37	22	11	7	19	30	23	7	14	28																					0	0	0	0	0	0
AT2G21660	AT2G21660.1	176		9	14	3	10	1	3	9	70	1	5	3	4	3	5	0	14	5	2	10	5	0.0538701	0.0806532	0.0179567	0.0598556	0.00598556	0.0179567	0.0538701	0.381254	0.00598556	0.0299278	0.0179567	0.0239423	0.0179567	0.0299278	0	0.0775086	0.0299278	0.0119711	0.0535663	0.0299278	5.38701	8.06532	1.79567	5.98556	0.598556	1.79567
AT2G21660	AT2G21660.2	159		9	13	3	10	1	3	9	58	1	5	3	4	3	5	0	12	5	2	8	5																					0	0	0	0	0	0
AT2G26190	AT2G26190.1	532		33	34	23	15	7	18	56	26	9	19	42	36	9	25	34	52	33	10	16	35	0.0620301	0.0639098	0.0432331	0.0281955	0.0131579	0.0338346	0.105263	0.0488722	0.0169173	0.0357143	0.0789474	0.0676692	0.0169173	0.0469925	0.0639098	0.0977444	0.0620301	0.018797	0.0300752	0.0657895	6.20301	6.39098	4.32331	2.81955	1.31579	3.38346
AT2G28190	AT2G28190.1	216		18	8	17	10	3	3	7	24	9	8	21	7	2	7	14	18	21	0	0	19	0.0833333	0.037037	0.0787037	0.0462963	0.0138889	0.0138889	0.0324074	0.111111	0.0416667	0.037037	0.0972222	0.0324074	0.00925926	0.0324074	0.0648148	0.0833333	0.0972222	0	0	0.087963	8.33333	3.7037	7.87037	4.62963	1.38889	1.38889
AT2G36880	AT2G36880.1	390		31	15	11	32	8	11	21	36	12	27	25	29	8	15	21	14	30	3	9	32	0.0794872	0.0384615	0.0282051	0.0820513	0.0205128	0.0282051	0.0538462	0.0923077	0.0307692	0.0692308	0.0641026	0.074359	0.0205128	0.0384615	0.0538462	0.0358974	0.0769231	0.00769231	0.0230769	0.0820513	7.94872	3.84615	2.82051	8.20513	2.05128	2.82051
AT2G36880	AT2G36880.2	390		31	15	11	32	8	11	21	36	12	27	25	29	8	15	21	14	30	3	9	32																					0	0	0	0	0	0
AT2G39730	AT2G39730.1	474		39	24	27	31	7	21	25	46	3	23	33	29	20	20	21	24	26	3	16	36	0.0815429	0.0514522	0.0550652	0.0623878	0.0124389	0.0433295	0.0551534	0.0969882	0.00661943	0.050749	0.0713105	0.0654826	0.0441295	0.0411231	0.0410704	0.0521996	0.0543619	0.00661943	0.0338004	0.0741761	8.15429	5.14522	5.50652	6.23878	1.24389	4.33295
AT2G39730	AT2G39730.2	446		36	23	24	27	5	19	26	43	3	23	32	31	20	18	18	24	24	3	15	32																					0	0	0	0	0	0
AT2G39730	AT2G39730.3	441		36	23	24	27	5	19	24	43	3	23	32	29	20	18	17	23	24	3	15	33																					0	0	0	0	0	0
AT2G39850	AT2G39850.1	775		54	42	39	52	9	16	53	48	14	46	61	64	13	36	34	57	48	14	33	42	0.0696774	0.0541935	0.0503226	0.0670968	0.0116129	0.0206452	0.0683871	0.0619355	0.0180645	0.0593548	0.0787097	0.0825806	0.0167742	0.0464516	0.043871	0.0735484	0.0619355	0.0180645	0.0425806	0.0541935	6.96774	5.41935	5.03226	6.70968	1.16129	2.06452
AT2G43750	AT2G43750.1	392		43	15	11	10	5	13	31	34	3	31	36	28	9	12	21	35	21	1	8	25	0.109694	0.0382653	0.0280612	0.0255102	0.0127551	0.0331633	0.0790816	0.0867347	0.00765306	0.0790816	0.0918367	0.0714286	0.0229592	0.0306122	0.0535714	0.0892857	0.0535714	0.00255102	0.0204082	0.0637755	10.9694	3.82653	2.80612	2.55102	1.27551	3.31633
AT2G43750	AT2G43750.2	392		43	15	11	10	5	13	31	34	3	31	36	28	9	12	21	35	21	1	8	25																					0	0	0	0	0	0
AT2G44160	AT2G44160.1	594		42	25	30	39	11	20	40	39	9	37	46	40	16	27	31	40	26	13	20	43	0.0707071	0.0420875	0.0505051	0.0656566	0.0185185	0.03367	0.0673401	0.0656566	0.0151515	0.0622896	0.0774411	0.0673401	0.026936	0.0454545	0.0521886	0.0673401	0.043771	0.0218855	0.03367	0.0723906	7.07071	4.20875	5.05051	6.56566	1.85185	3.367
AT2G44220	AT2G44220.1	403	0	18	26	23	18	7	12	15	38	12	20	23	29	9	22	18	24	34	11	19	25	0.044665	0.0645161	0.057072	0.044665	0.0173697	0.0297767	0.0372208	0.0942928	0.0297767	0.0496278	0.057072	0.0719603	0.0223325	0.0545906	0.044665	0.0595533	0.0843672	0.0272953	0.0471464	0.0620347	4.4665	6.45161	5.7072	4.4665	1.73697	2.97767
AT2G45770	AT2G45770.1	366	0	31	22	11	16	5	4	33	35	3	20	42	28	8	18	11	26	18	2	2	31	0.0839047	0.0595453	0.0297726	0.0446461	0.0148735	0.0108264	0.0893179	0.0960716	0.00811981	0.0541321	0.113677	0.0757849	0.0216528	0.0513998	0.0297726	0.0730526	0.0487189	0.00541321	0.00541321	0.0839047	8.39047	5.95453	2.97726	4.46461	1.48735	1.08264
AT2G45770	AT2G45770.2	373	0	31	22	11	17	6	4	33	36	3	20	42	28	8	20	11	28	18	2	2	31																					0	0	0	0	0	0
AT2G47730	AT2G47730.1	263	0	25	9	6	13	1	13	16	12	9	14	29	22	7	13	12	28	12	3	5	14	0.095057	0.0342205	0.0228137	0.0494297	0.00380228	0.0494297	0.0608365	0.0456274	0.0342205	0.0532319	0.110266	0.0836502	0.026616	0.0494297	0.0456274	0.106464	0.0456274	0.0114068	0.0190114	0.0532319	9.5057	3.42205	2.28137	4.94297	0.380228	4.94297
AT3G01500	AT3G01500.1	270	0	25	5	8	14	6	6	22	23	4	14	25	26	4	14	10	16	12	3	9	24	0.0923578	0.0217943	0.0274506	0.0436294	0.0210762	0.0230288	0.0759775	0.0752593	0.0117569	0.0494874	0.0933185	0.082837	0.0147017	0.0504795	0.0494466	0.0978602	0.0470183	0.0105224	0.0306379	0.0813599	9.23578	2.17943	2.74506	4.36294	2.10762	2.30288
AT3G01500	AT3G01500.2	347	0	32	8	9	14	7	8	25	24	4	17	33	27	5	17	19	40	17	4	10	27																					0	0	0	0	0	0
AT3G01500	AT3G01500.3	336	0	31	8	9	13	7	8	25	24	3	16	31	25	5	17	19	40	16	3	10	26																					0	0	0	0	0	0
AT3G01900	AT3G01900.1	496	0	30	38	18	29	10	8	35	27	8	24	52	27	11	27	27	31	30	8	14	42	0.0604839	0.0766129	0.0362903	0.0584677	0.0201613	0.016129	0.0705645	0.0544355	0.016129	0.0483871	0.104839	0.0544355	0.0221774	0.0544355	0.0544355	0.0625	0.0604839	0.016129	0.0282258	0.0846774	6.04839	7.66129	3.62903	5.84677	2.01613	1.6129
AT3G02910	AT3G02910.1	187	0	11	16	6	8	3	4	19	16	7	6	17	6	3	7	10	14	10	1	12	11	0.0588235	0.0855615	0.0320856	0.0427807	0.0160428	0.0213904	0.101604	0.0855615	0.0374332	0.0320856	0.0909091	0.0320856	0.0160428	0.0374332	0.0534759	0.0748663	0.0534759	0.00534759	0.0641711	0.0588235	5.88235	8.55615	3.20856	4.27807	1.60428	2.13904
AT3G04120	AT3G04120.1	338	0	29	13	12	27	2	3	18	27	6	21	21	31	8	13	11	23	21	5	9	38	0.0857988	0.0384615	0.035503	0.0798817	0.00591716	0.00887574	0.0532544	0.0798817	0.0177515	0.0621302	0.0621302	0.091716	0.0236686	0.0384615	0.0325444	0.0680473	0.0621302	0.0147929	0.0266272	0.112426	8.57988	3.84615	3.5503	7.98817	0.591716	0.887574
AT3G09820	AT3G09820.1	344	0	32	7	15	20	8	13	23	28	6	17	23	27	10	15	15	18	17	3	17	30	0.0928692	0.0234195	0.0416699	0.0505929	0.0248729	0.0371073	0.0698541	0.083744	0.0169991	0.0511994	0.0582647	0.0789793	0.0294355	0.0449811	0.0433255	0.0509972	0.052855	0.00932735	0.0511994	0.0883066	9.28692	2.34195	4.16699	5.05929	2.48729	3.71073
AT3G09820	AT3G09820.2	302	0	28	8	12	13	8	11	22	26	5	16	15	24	9	14	13	15	17	3	16	27																					0	0	0	0	0	0
AT3G11630	AT3G11630.1	266	0	18	12	6	16	2	8	13	15	4	16	24	17	3	17	14	41	13	2	6	19	0.0676692	0.0451128	0.0225564	0.0601504	0.0075188	0.0300752	0.0488722	0.056391	0.0150376	0.0601504	0.0902256	0.0639098	0.0112782	0.0639098	0.0526316	0.154135	0.0488722	0.0075188	0.0225564	0.0714286	6.76692	4.51128	2.25564	6.01504	0.75188	3.00752
AT3G13920	AT3G13920.1	412	0	23	29	11	31	5	29	26	28	6	24	40	20	12	23	13	21	23	2	9	37	0.0543655	0.0721199	0.025694	0.0733572	0.0146559	0.068447	0.0629571	0.0678165	0.015294	0.0580741	0.0972115	0.0489069	0.0299661	0.0543968	0.03177	0.0519742	0.0568454	0.0054931	0.0207796	0.0898754	5.43655	7.21199	2.5694	7.33572	1.46559	6.8447
AT3G13920	AT3G13920.2	415	0	24	31	9	29	8	28	26	30	6	24	39	20	12	22	14	21	24	3	9	36																					0	0	0	0	0	0
AT3G13920	AT3G13920.3	402	0	20	29	11	29	6	26	25	26	7	24	40	20	13	21	12	22	23	2	9	37																					0	0	0	0	0	0
AT3G13920	AT3G13920.4	407	0	22	29	11	31	5	29	26	27	6	23	40	20	12	23	13	21	23	2	7	37																					0	0	0	0	0	0
AT3G14700	AT3G14700.1	204	0	10	21	7	16	2	7	21	14	7	12	10	27	6	4	2	16	4	1	2	15	0.0490196	0.102941	0.0343137	0.0784314	0.00980392	0.0343137	0.102941	0.0686275	0.0343137	0.0588235	0.0490196	0.132353	0.0294118	0.0196078	0.00980392	0.0784314	0.0196078	0.00490196	0.00980392	0.0735294	4.90196	10.2941	3.43137	7.84314	0.980392	3.43137
AT3G16470	AT3G16470.1	451	0	21	3	5	29	1	11	34	65	10	27	30	43	1	20	19	32	28	3	27	42	0.0501218	0.00667926	0.0118803	0.0641921	0.00260053	0.0241165	0.0760724	0.142098	0.0226383	0.058991	0.0656703	0.0972325	0.00260053	0.0441543	0.0415537	0.069749	0.0604692	0.00667926	0.0612357	0.091265	5.01218	0.667926	1.18803	6.41921	0.260053	2.41165
AT3G16470	AT3G16470.2	451	0	21	3	5	29	1	11	34	65	10	27	30	43	1	20	19	32	28	3	27	42																					0	0	0	0	0	0
AT3G16470	AT3G16470.3	297	0	17	2	4	19	1	7	23	41	7	17	19	30	1	13	12	20	17	2	19	26																					0	0	0	0	0	0
AT3G17390	AT3G17390.1	393	0	27	15	12	28	7	12	27	38	12	27	25	28	7	14	19	20	27	3	9	36	0.0687023	0.0381679	0.0305344	0.0712468	0.0178117	0.0305344	0.0687023	0.0966921	0.0305344	0.0687023	0.0636132	0.0712468	0.0178117	0.0356234	0.0483461	0.0508906	0.0687023	0.00763359	0.0229008	0.0916031	6.87023	3.81679	3.05344	7.12468	1.78117	3.05344
AT3G44050	AT3G44050.1	1263	0	82	69	74	60	15	67	151	53	25	76	117	108	44	31	20	128	54	6	11	72	0.0649248	0.0546318	0.0585907	0.0475059	0.0118765	0.0530483	0.119557	0.0419636	0.0197941	0.0601742	0.0926366	0.0855107	0.0348377	0.0245447	0.0158353	0.101346	0.0427553	0.00475059	0.00870942	0.0570071	6.49248	5.46318	5.85907	4.75059	1.18765	5.30483
AT3G44310	AT3G44310.1	346	0	27	15	9	21	7	10	21	30	12	18	24	19	6	16	19	24	21	4	15	28	0.0728565	0.0408065	0.0232934	0.064272	0.0239041	0.0311726	0.0598077	0.0875654	0.0350261	0.0540273	0.0745166	0.0559541	0.0175131	0.0457095	0.054466	0.0700523	0.0583196	0.0136595	0.0437827	0.0732951	7.28565	4.08065	2.32934	6.4272	2.39041	3.11726
AT3G44310	AT3G44310.2	224	0	14	8	4	16	7	8	13	20	8	13	19	13	4	10	12	16	12	4	10	13																					0	0	0	0	0	0
AT3G44310	AT3G44310.3	346	0	27	15	9	21	7	10	21	30	12	18	24	19	6	16	19	24	21	4	15	28																					0	0	0	0	0	0
AT3G45140	AT3G45140.1	896	0	57	50	35	51	10	35	75	55	19	54	88	52	8	33	61	50	55	20	38	50	0.0636161	0.0558036	0.0390625	0.0569196	0.0111607	0.0390625	0.0837054	0.0613839	0.0212054	0.0602679	0.0982143	0.0580357	0.00892857	0.0368304	0.0680804	0.0558036	0.0613839	0.0223214	0.0424107	0.0558036	6.36161	5.58036	3.90625	5.69196	1.11607	3.90625
AT3G47520	AT3G47520.1	403	0	45	10	19	21	4	9	17	26	5	22	38	32	4	15	19	43	26	0	8	40	0.111663	0.0248139	0.0471464	0.0521092	0.00992556	0.0223325	0.0421836	0.0645161	0.0124069	0.0545906	0.0942928	0.0794045	0.00992556	0.0372208	0.0471464	0.1067	0.0645161	0	0.0198511	0.0992556	11.1663	2.48139	4.71464	5.21092	0.992556	2.23325
AT3G47550	AT3G47550.1	232	0	20	11	9	21	11	6	22	8	7	9	24	5	3	5	15	23	15	2	9	7	0.101204	0.0574316	0.0360955	0.080172	0.0419948	0.0345989	0.0874619	0.0429664	0.0274561	0.046052	0.104322	0.0190886	0.0159294	0.0253009	0.0704225	0.0813231	0.0525175	0.0103756	0.0343594	0.0309283	10.1204	5.74316	3.60955	8.0172	4.19948	3.45989
AT3G47550	AT3G47550.2	249	0	24	16	9	21	11	9	22	10	6	12	28	5	4	6	16	20	12	3	9	6																					0	0	0	0	0	0
AT3G47550	AT3G47550.3	288	0	32	17	10	21	11	11	24	14	8	14	29	5	5	8	22	21	14	3	9	10																					0	0	0	0	0	0
AT3G47550	AT3G47550.6	288	0	32	17	10	21	11	11	24	14	8	14	29	5	5	8	22	21	14	3	9	10																					0	0	0	0	0	0
AT3G50820	AT3G50820.1	331	0	31	9	8	18	4	12	22	35	2	11	23	29	3	18	17	32	26	1	8	22	0.0936556	0.0271903	0.0241692	0.0543807	0.0120846	0.0362538	0.0664653	0.10574	0.0060423	0.0332326	0.0694864	0.0876133	0.00906344	0.0543807	0.0513595	0.0966767	0.0785498	0.00302115	0.0241692	0.0664653	9.36556	2.71903	2.41692	5.43807	1.20846	3.62538
AT3G52300	AT3G52300.1	168	0	13	8	4	16	0	5	20	7	1	10	10	22	3	7	6	9	7	3	8	9	0.0837724	0.0565964	0.0201015	0.092701	0	0.0312744	0.100507	0.0577186	0.00297619	0.0666472	0.0461553	0.114657	0.0171253	0.0413251	0.0383489	0.0513759	0.0495219	0.0171253	0.0483997	0.063671	8.37724	5.65964	2.01015	9.2701	0	3.12744
AT3G52300	AT3G52300.2	122	0	11	8	2	11	0	4	10	9	0	9	4	12	2	5	5	6	7	2	6	9																					0	0	0	0	0	0
AT3G52880	AT3G52880.1	434	0	47	13	10	24	3	11	29	48	3	22	33	39	5	22	18	28	17	3	18	41	0.104577	0.0310714	0.0222504	0.0544738	0.00882103	0.0244754	0.064526	0.106802	0.00667511	0.0521697	0.0830828	0.0899953	0.0111252	0.0489508	0.0400506	0.0665928	0.0399715	0.00774807	0.0411236	0.0955183	10.4577	3.10714	2.22504	5.44738	0.882103	2.44754
AT3G52880	AT3G52880.2	466	0	47	15	10	25	5	11	29	48	3	25	42	42	5	22	18	32	19	4	19	45																					0	0	0	0	0	0
AT3G52930	AT3G52930.1	358	0	40	14	14	15	6	10	30	32	7	16	37	27	3	9	14	22	23	3	11	25	0.111732	0.0391061	0.0391061	0.0418994	0.0167598	0.027933	0.0837989	0.0893855	0.0195531	0.0446927	0.103352	0.075419	0.00837989	0.0251397	0.0391061	0.0614525	0.0642458	0.00837989	0.0307263	0.0698324	11.1732	3.91061	3.91061	4.18994	1.67598	2.7933
AT3G57260	AT3G57260.1	339	0	25	13	19	19	1	15	20	26	4	15	31	14	8	15	19	32	18	3	17	25	0.0737463	0.0383481	0.0560472	0.0560472	0.00294985	0.0442478	0.0589971	0.0766962	0.0117994	0.0442478	0.0914454	0.0412979	0.0235988	0.0442478	0.0560472	0.0943953	0.0530973	0.00884956	0.0501475	0.0737463	7.37463	3.83481	5.60472	5.60472	0.294985	4.42478
AT3G61390	AT3G61390.1	373	0	24	28	14	12	8	16	47	12	10	29	27	42	11	7	8	27	18	3	12	18	0.0666543	0.0754645	0.0360081	0.0333272	0.0210687	0.0421374	0.125072	0.0333272	0.0283474	0.076805	0.0764229	0.103427	0.0296878	0.0197282	0.0256664	0.0729746	0.0482666	0.00976857	0.0298789	0.0459678	6.66543	7.54645	3.60081	3.33272	2.10687	4.21374
AT3G61390	AT3G61390.2	435	0	30	33	15	15	9	18	54	15	13	33	35	41	13	9	13	32	21	5	12	19																					0	0	0	0	0	0
AT3G63140	AT3G63140.1	406	0	36	16	19	21	3	5	23	28	8	18	33	31	6	23	19	52	19	5	7	34	0.08867	0.0394089	0.046798	0.0517241	0.00738916	0.0123153	0.0566502	0.0689655	0.0197044	0.044335	0.0812808	0.0763547	0.0147783	0.0566502	0.046798	0.128079	0.046798	0.0123153	0.0172414	0.0837438	8.867	3.94089	4.6798	5.17241	0.738916	1.23153
AT4G01050	AT4G01050.1	466	0	50	9	15	21	0	14	33	26	1	15	52	38	4	18	43	47	36	3	7	34	0.107296	0.0193133	0.0321888	0.0450644	0	0.0300429	0.0708155	0.055794	0.00214592	0.0321888	0.111588	0.0815451	0.00858369	0.0386266	0.0922747	0.100858	0.0772532	0.00643777	0.0150215	0.0729614	10.7296	1.93133	3.21888	4.50644	0	3.00429
AT4G02520	AT4G02520.1	212	0	20	9	6	10	0	10	21	10	8	13	21	17	3	12	9	8	13	1	7	14	0.0943396	0.0424528	0.0283019	0.0471698	0	0.0471698	0.0990566	0.0471698	0.0377358	0.0613208	0.0990566	0.0801887	0.0141509	0.0566038	0.0424528	0.0377358	0.0613208	0.00471698	0.0330189	0.0660377	9.43396	4.24528	2.83019	4.71698	0	4.71698
AT4G04640	AT4G04640.1	373	0	33	20	14	19	5	13	26	15	1	18	42	27	6	13	18	37	23	1	8	34	0.0884718	0.0536193	0.0375335	0.0509383	0.0134048	0.0348525	0.0697051	0.0402145	0.00268097	0.0482574	0.112601	0.0723861	0.0160858	0.0348525	0.0482574	0.0991957	0.0616622	0.00268097	0.0214477	0.0911528	8.84718	5.36193	3.75335	5.09383	1.34048	3.48525
AT4G17470	AT4G17470.1	308	0	16	7	14	14	6	11	21	22	7	19	29	18	6	20	20	28	14	2	12	22	0.0519481	0.0227273	0.0454545	0.0454545	0.0194805	0.0357143	0.0681818	0.0714286	0.0227273	0.0616883	0.0941558	0.0584416	0.0194805	0.0649351	0.0649351	0.0909091	0.0454545	0.00649351	0.038961	0.0714286	5.19481	2.27273	4.54545	4.54545	1.94805	3.57143
AT4G17470	AT4G17470.2	308	0	16	7	14	14	6	11	21	22	7	19	29	18	6	20	20	28	14	2	12	22																					0	0	0	0	0	0
AT4G17470	AT4G17470.3	308	0	16	7	14	14	6	11	21	22	7	19	29	18	6	20	20	28	14	2	12	22																					0	0	0	0	0	0
AT4G20360	AT4G20360.1	476	0	39	25	10	27	5	12	34	39	9	31	38	29	14	13	22	34	38	1	13	43	0.0819328	0.052521	0.0210084	0.0567227	0.0105042	0.0252101	0.0714286	0.0819328	0.0189076	0.0651261	0.0798319	0.0609244	0.0294118	0.0273109	0.0462185	0.0714286	0.0798319	0.00210084	0.0273109	0.0903361	8.19328	5.2521	2.10084	5.67227	1.05042	2.52101
AT4G24830	AT4G24830.1	494	0	43	23	15	24	6	16	37	41	7	25	46	35	13	14	20	42	27	5	15	40	0.0857445	0.0477238	0.0318489	0.0487359	0.0127395	0.0317499	0.0730049	0.0837202	0.0148628	0.0508592	0.0910031	0.0720918	0.0264912	0.0286145	0.041354	0.0869546	0.0528835	0.0106163	0.0285155	0.0804858	8.57445	4.77238	3.18489	4.87359	1.27395	3.17499
AT4G24830	AT4G24830.2	450	0	38	22	15	22	6	14	32	38	7	23	40	33	12	13	19	40	23	5	12	36																					0	0	0	0	0	0
AT4G33010	AT4G33010.1	1037	0	103	42	44	52	17	31	52	78	38	64	79	53	39	39	64	70	67	7	31	67	0.0978182	0.0402302	0.0432437	0.0501748	0.0169057	0.0303158	0.0496625	0.0760306	0.0383016	0.0641574	0.0760005	0.0506569	0.0382715	0.0377592	0.0600591	0.0670504	0.0645793	0.0054243	0.0292912	0.064067	9.78182	4.02302	4.32437	5.01748	1.69057	3.03158
AT4G33010	AT4G33010.2	976	0	94	39	43	49	17	30	48	75	39	65	74	49	38	37	57	65	63	4	28	62																					0	0	0	0	0	0
AT4G36390	AT4G36390.1	640	0	42	46	26	37	17	17	47	35	14	32	56	34	16	27	25	69	33	5	18	44	0.065625	0.071875	0.040625	0.0578125	0.0265625	0.0265625	0.0734375	0.0546875	0.021875	0.05	0.0875	0.053125	0.025	0.0421875	0.0390625	0.107813	0.0515625	0.0078125	0.028125	0.06875	6.5625	7.1875	4.0625	5.78125	2.65625	2.65625
AT4G38070	AT4G38070.1	1513	0	88	88	76	73	26	79	208	45	20	63	177	159	42	40	17	121	56	8	33	94	0.0581626	0.0581626	0.0502313	0.0482485	0.0171844	0.0522141	0.137475	0.0297422	0.0132188	0.0416391	0.116986	0.105089	0.0277594	0.0264375	0.011236	0.0799736	0.0370126	0.00528751	0.021811	0.0621282	5.81626	5.81626	5.02313	4.82485	1.71844	5.22141
AT4G38220	AT4G38220.1	430	0	39	19	13	22	1	13	31	30	11	20	45	27	8	22	27	38	13	7	15	29	0.0903835	0.044033	0.0301278	0.0509856	0.00231753	0.0312826	0.0718433	0.0706805	0.0254928	0.0463505	0.105443	0.0625732	0.0185402	0.0509856	0.0625732	0.088066	0.0301278	0.0162227	0.0347629	0.0672082	9.03835	4.4033	3.01278	5.09856	0.231753	3.12826
AT4G38220	AT4G38220.2	433	0	39	19	13	22	1	14	31	31	11	20	46	27	8	22	27	38	13	7	15	29																					0	0	0	0	0	0
AT4G38970	AT4G38970.1	398	0	46	19	19	13	3	17	27	31	2	13	40	21	8	10	19	33	24	7	13	33	0.107658	0.0593024	0.0422421	0.0347044	0.00901819	0.0423542	0.066728	0.0796271	0.00776191	0.0360167	0.0988077	0.050004	0.0205489	0.0243738	0.0488037	0.083452	0.0590221	0.0153556	0.0281427	0.0860767	10.7658	5.93024	4.22421	3.47044	0.901819	4.23542
AT4G38970	AT4G38970.2	381	0	38	27	14	14	4	16	25	31	4	15	37	18	8	9	19	32	22	5	9	34																					0	0	0	0	0	0
AT4G39260	AT4G39260.1	169	0	5	15	4	9	1	3	11	65	0	5	3	4	3	6	0	14	4	2	9	6	0.0404279	0.0851983	0.0318661	0.0699734	0.00856176	0.0233043	0.0776335	0.283067	0	0.0404279	0.0233043	0.0318661	0.0256853	0.0513706	0	0.0782239	0.0318661	0.0171235	0.0334913	0.0466087	4.04279	8.51983	3.18661	6.99734	0.856176	2.33043
AT4G39260	AT4G39260.2	126	0	5	10	4	8	1	3	9	38	0	5	3	4	3	6	0	11	4	2	4	6																					0	0	0	0	0	0
AT4G39260	AT4G39260.3	92	0	5	8	4	8	1	3	9	13	0	5	3	4	3	6	0	7	4	2	1	6																					0	0	0	0	0	0
AT4G39260	AT4G39260.4	105	0	4	9	3	8	1	2	8	32	0	4	2	3	3	6	0	7	3	2	4	4																					0	0	0	0	0	0
AT5G02590	AT5G02590.1	326	0	25	16	13	15	4	14	30	6	9	17	35	32	5	13	23	24	18	1	10	16	0.0766871	0.0490798	0.0398773	0.0460123	0.0122699	0.0429448	0.0920245	0.0184049	0.0276074	0.0521472	0.107362	0.0981595	0.0153374	0.0398773	0.0705521	0.0736196	0.0552147	0.00306748	0.0306748	0.0490798	7.66871	4.90798	3.98773	4.60123	1.22699	4.29448
AT5G08670	AT5G08670.1	556	0	55	34	16	30	3	21	35	54	10	34	54	26	10	14	30	39	31	0	17	43	0.0989209	0.0611511	0.028777	0.0539568	0.00539568	0.0377698	0.0629496	0.0971223	0.0179856	0.0611511	0.0971223	0.0467626	0.0179856	0.0251799	0.0539568	0.0701439	0.0557554	0	0.0305755	0.0773381	9.89209	6.11511	2.8777	5.39568	0.539568	3.77698
AT5G09810	AT5G09810.1	377	0	28	18	9	22	4	10	28	30	9	28	28	20	16	11	21	27	22	4	15	27	0.0742706	0.0477454	0.0238727	0.0583554	0.0106101	0.0265252	0.0742706	0.0795756	0.0238727	0.0742706	0.0742706	0.0530504	0.0424403	0.0291777	0.0557029	0.071618	0.0583554	0.0106101	0.0397878	0.071618	7.42706	4.77454	2.38727	5.83554	1.06101	2.65252
AT5G14740	AT5G14740.1	331	0	28	12	12	16	9	6	23	21	8	13	30	27	5	21	15	32	12	3	11	27	0.0849136	0.036752	0.0359698	0.0509672	0.0293675	0.0172127	0.0716189	0.0637829	0.0229079	0.0426834	0.0874418	0.0835763	0.0153964	0.0605671	0.0447717	0.0949846	0.0341713	0.00828378	0.032091	0.08254	8.49136	3.6752	3.59698	5.09672	2.93675	1.72127
AT5G14740	AT5G14740.2	259	0	24	6	10	15	6	4	21	19	5	13	21	23	4	14	11	21	6	2	9	25																					0	0	0	0	0	0
AT5G14740	AT5G14740.3	330	0	27	12	12	16	9	6	22	21	8	13	31	27	5	21	15	32	12	3	11	27																					0	0	0	0	0	0
AT5G14740	AT5G14740.4	330	0	28	12	12	16	9	6	22	21	8	13	30	27	5	21	15	32	12	3	11	27																					0	0	0	0	0	0
AT5G14740	AT5G14740.5	310	0	25	16	10	16	13	5	23	17	7	14	25	26	5	18	14	32	12	2	8	22																					0	0	0	0	0	0
AT5G14780	AT5G14780.1	384	0	37	19	18	21	5	13	25	33	9	22	33	27	12	11	18	17	19	4	15	26	0.0963542	0.0494792	0.046875	0.0546875	0.0130208	0.0338542	0.0651042	0.0859375	0.0234375	0.0572917	0.0859375	0.0703125	0.03125	0.0286458	0.046875	0.0442708	0.0494792	0.0104167	0.0390625	0.0677083	9.63542	4.94792	4.6875	5.46875	1.30208	3.38542
AT5G17920	AT5G17920.1	765	0	77	32	25	44	6	24	51	50	15	40	73	55	18	27	32	54	41	11	26	64	0.100654	0.0418301	0.0326797	0.0575163	0.00784314	0.0313725	0.0666667	0.0653595	0.0196078	0.0522876	0.0954248	0.0718954	0.0235294	0.0352941	0.0418301	0.0705882	0.0535948	0.0143791	0.0339869	0.0836601	10.0654	4.18301	3.26797	5.75163	0.784314	3.13725
AT5G17920	AT5G17920.2	765	0	77	32	25	44	6	24	51	50	15	40	73	55	18	27	32	54	41	11	26	64																					0	0	0	0	0	0
AT5G19510	AT5G19510.1	224	0	27	2	5	22	1	4	22	14	2	8	13	22	6	9	12	17	9	3	5	21	0.120536	0.00892857	0.0223214	0.0982143	0.00446429	0.0178571	0.0982143	0.0625	0.00892857	0.0357143	0.0580357	0.0982143	0.0267857	0.0401786	0.0535714	0.0758929	0.0401786	0.0133929	0.0223214	0.09375	12.0536	0.892857	2.23214	9.82143	0.446429	1.78571
AT5G23120	AT5G23120.1	403	0	31	28	16	20	1	11	23	40	2	20	37	15	4	17	23	48	17	11	14	25	0.0769231	0.0694789	0.0397022	0.0496278	0.00248139	0.0272953	0.057072	0.0992556	0.00496278	0.0496278	0.0918114	0.0372208	0.00992556	0.0421836	0.057072	0.119107	0.0421836	0.0272953	0.0347395	0.0620347	7.69231	6.94789	3.97022	4.96278	0.248139	2.72953
AT5G24770	AT5G24770.1	265	0	16	5	15	16	3	5	13	17	3	17	36	22	1	5	12	18	15	8	18	20	0.0662464	0.0142417	0.0523403	0.0614387	0.0128719	0.0166455	0.0533745	0.0609216	0.0128719	0.0681332	0.142444	0.079971	0.00429064	0.0190493	0.0394684	0.0676161	0.0619557	0.0319213	0.0676161	0.066582	6.62464	1.42417	5.23403	6.14387	1.28719	1.66455
AT5G24770	AT5G24770.2	208	0	15	2	10	13	3	3	12	12	3	15	31	16	1	4	7	14	14	7	14	12																					0	0	0	0	0	0
AT5G25980	AT5G25980.1	467	0	24	26	18	32	9	14	23	41	11	24	43	26	9	28	25	24	33	9	29	19	0.0501052	0.0566167	0.0409305	0.0694477	0.0189418	0.0297359	0.0480683	0.0871707	0.0224063	0.0494959	0.0924633	0.0566167	0.0183324	0.0606905	0.0515328	0.0531522	0.0702658	0.0195512	0.0621181	0.0423581	5.01052	5.66167	4.09305	6.94477	1.89418	2.97359
AT5G25980	AT5G25980.2	547	0	26	32	25	39	10	16	25	47	11	25	51	32	9	34	26	31	38	11	34	25																					0	0	0	0	0	0
AT5G25980	AT5G25980.3	467	0	24	26	18	32	9	14	23	41	11	24	43	26	9	28	25	24	33	9	29	19																					0	0	0	0	0	0
AT5G26000	AT5G26000.1	541	0	34	23	30	43	10	14	24	45	9	21	43	35	10	36	23	32	38	9	31	31	0.0632215	0.0409938	0.0518492	0.0770219	0.0191106	0.0260969	0.0452075	0.0843528	0.0181864	0.0402418	0.0803114	0.0630493	0.0202071	0.06507	0.0464762	0.0547942	0.0724008	0.0159934	0.0593524	0.0560629	6.32215	4.09938	5.18492	7.70219	1.91106	2.60969
AT5G26000	AT5G26000.2	456	0	29	18	22	34	9	12	21	39	9	19	37	28	10	29	23	23	34	7	28	25																					0	0	0	0	0	0
AT5G26770	AT5G26770.1	335	0	22	26	8	20	7	22	40	9	4	11	40	40	10	9	2	27	15	2	0	21	0.0660033	0.0760799	0.024386	0.060965	0.0202796	0.0638869	0.119814	0.0274343	0.012193	0.0335308	0.117697	0.119814	0.0304825	0.0263761	0.0060965	0.0812446	0.0446656	0.0060965	0	0.0629551	6.60033	7.60799	2.4386	6.0965	2.02796	6.38869
AT5G26770	AT5G26770.2	335	0	22	26	8	20	7	22	40	9	4	11	40	40	10	9	2	27	15	2	0	21																					0	0	0	0	0	0
AT5G26770	AT5G26770.3	315	0	21	23	8	20	6	19	38	9	4	11	36	38	10	8	2	26	14	2	0	20																					0	0	0	0	0	0
AT5G28540	AT5G28540.1	669	0	52	27	30	47	5	25	67	57	6	45	49	65	9	25	21	31	39	2	14	53	0.077728	0.0403587	0.044843	0.0702541	0.00747384	0.0373692	0.100149	0.0852018	0.00896861	0.0672646	0.0732436	0.0971599	0.0134529	0.0373692	0.0313901	0.0463378	0.058296	0.00298954	0.0209268	0.0792227	7.7728	4.03587	4.4843	7.02541	0.747384	3.73692
AT5G35630	AT5G35630.1	430	0	32	22	20	20	7	16	30	40	7	28	33	26	5	9	25	34	22	13	14	27	0.0744186	0.0511628	0.0465116	0.0465116	0.0162791	0.0372093	0.0697674	0.0930233	0.0162791	0.0651163	0.0767442	0.0604651	0.0116279	0.0209302	0.0581395	0.0790698	0.0511628	0.0302326	0.0325581	0.0627907	7.44186	5.11628	4.65116	4.65116	1.62791	3.72093
AT5G35630	AT5G35630.2	430	0	32	22	20	20	7	16	30	40	7	28	33	26	5	9	25	34	22	13	14	27																					0	0	0	0	0	0
AT5G35630	AT5G35630.3	430	0	32	22	20	20	7	16	30	40	7	28	33	26	5	9	25	34	22	13	14	27																					0	0	0	0	0	0
AT5G35790	AT5G35790.1	576	0	37	41	24	31	7	17	43	37	12	29	64	34	10	31	27	47	28	5	23	29	0.0642361	0.0711806	0.0416667	0.0538194	0.0121528	0.0295139	0.0746528	0.0642361	0.0208333	0.0503472	0.111111	0.0590278	0.0173611	0.0538194	0.046875	0.0815972	0.0486111	0.00868056	0.0399306	0.0503472	6.42361	7.11806	4.16667	5.38194	1.21528	2.95139
AT5G37600	AT5G37600.1	356	0	29	17	16	22	4	8	23	39	7	29	17	18	8	8	25	21	16	10	17	22	0.0814607	0.0477528	0.0449438	0.0617978	0.011236	0.0224719	0.0646067	0.109551	0.0196629	0.0814607	0.0477528	0.0505618	0.0224719	0.0224719	0.0702247	0.0589888	0.0449438	0.0280899	0.0477528	0.0617978	8.14607	4.77528	4.49438	6.17978	1.1236	2.24719
AT5G38410	AT5G38410.1	181	0	14	7	5	7	5	4	12	11	2	9	12	14	5	10	12	15	12	4	8	13	0.0776922	0.0369304	0.0295393	0.0388461	0.0277472	0.0221978	0.0646776	0.0591282	0.00918318	0.0517371	0.0665933	0.0794843	0.0277472	0.0535787	0.0665933	0.0832417	0.0683854	0.0221978	0.0424798	0.0720192	7.76922	3.69304	2.95393	3.88461	2.77472	2.21978
AT5G38410	AT5G38410.2	174	0	14	6	5	7	5	4	11	10	1	9	12	14	5	9	12	15	12	4	7	12																					0	0	0	0	0	0
AT5G38410	AT5G38410.3	186	0	14	7	6	7	5	4	12	11	2	10	12	15	5	10	12	15	13	4	8	14																					0	0	0	0	0	0
AT5G41670	AT5G41670.1	487	0	48	31	20	31	6	17	34	48	3	28	45	29	12	11	15	31	19	7	18	34	0.0985626	0.063655	0.0410678	0.063655	0.0123203	0.0349076	0.0698152	0.0985626	0.00616016	0.0574949	0.0924025	0.0595483	0.0246407	0.0225873	0.0308008	0.063655	0.0390144	0.0143737	0.036961	0.0698152	9.85626	6.3655	4.10678	6.3655	1.23203	3.49076
AT5G41670	AT5G41670.2	487	0	48	31	20	31	6	17	34	48	3	28	45	29	12	11	15	31	19	7	18	34																					0	0	0	0	0	0
AT5G48300	AT5G48300.1	520	0	45	24	24	33	6	14	26	37	8	43	42	31	11	15	25	48	28	3	20	37	0.0865385	0.0461538	0.0461538	0.0634615	0.0115385	0.0269231	0.05	0.0711538	0.0153846	0.0826923	0.0807692	0.0596154	0.0211538	0.0288462	0.0480769	0.0923077	0.0538462	0.00576923	0.0384615	0.0711538	8.65385	4.61538	4.61538	6.34615	1.15385	2.69231
AT5G49910	AT5G49910.1	718	0	57	35	32	53	2	28	48	59	3	40	53	52	9	26	31	62	56	1	7	64	0.0793872	0.0487465	0.0445682	0.0738162	0.00278552	0.0389972	0.0668524	0.0821727	0.00417827	0.0557103	0.0738162	0.0724234	0.0125348	0.0362117	0.0431755	0.086351	0.0779944	0.00139276	0.0097493	0.0891365	7.93872	4.87465	4.45682	7.38162	0.278552	3.89972
AT5G50920	AT5G50920.1	929	0	69	76	28	42	4	33	100	78	13	61	89	61	27	26	34	54	47	1	19	67	0.0742734	0.0818084	0.0301399	0.0452099	0.00430571	0.0355221	0.107643	0.0839612	0.0139935	0.065662	0.0958019	0.065662	0.0290635	0.0279871	0.0365985	0.058127	0.050592	0.00107643	0.0204521	0.0721206	7.42734	8.18084	3.01399	4.52099	0.430571	3.55221
AT5G52890	AT5G52890.1	357	0	32	13	18	26	2	22	32	25	2	10	22	21	10	9	27	34	27	0	3	22	0.0902725	0.0350904	0.0485867	0.0727782	0.00539852	0.0593838	0.0863764	0.0687802	0.00539852	0.02959	0.0606825	0.0605806	0.0269926	0.0268908	0.0741788	0.0982684	0.0793736	0	0.00809778	0.0632799	9.02725	3.50904	4.85867	7.27782	0.539852	5.93838
AT5G52890	AT5G52890.2	385	0	35	13	18	28	2	22	32	26	2	12	23	24	10	11	28	39	32	0	3	25																					0	0	0	0	0	0
AT5G54520	AT5G54520.1	457	0	24	22	19	25	9	13	21	25	14	20	29	27	4	16	38	61	18	8	19	45	0.0525164	0.04814	0.0415755	0.0547046	0.0196937	0.0284464	0.0459519	0.0547046	0.0306346	0.0437637	0.0634573	0.059081	0.00875274	0.0350109	0.083151	0.133479	0.0393873	0.0175055	0.0415755	0.0984683	5.25164	4.814	4.15755	5.47046	1.96937	2.84464
AT5G62690	AT5G62690.1	450	0	24	23	22	26	12	23	38	36	9	15	35	14	21	23	19	32	28	5	17	28	0.0533333	0.0511111	0.0488889	0.0577778	0.0266667	0.0511111	0.0844444	0.08	0.02	0.0333333	0.0777778	0.0311111	0.0466667	0.0511111	0.0422222	0.0711111	0.0622222	0.0111111	0.0377778	0.0622222	5.33333	5.11111	4.88889	5.77778	2.66667	5.11111
AT5G66570	AT5G66570.1	332	0	30	9	7	18	4	12	22	34	1	9	22	28	3	20	17	34	29	1	8	24	0.0903614	0.0271084	0.0210843	0.0542169	0.0120482	0.0361446	0.0662651	0.10241	0.00301205	0.0271084	0.0662651	0.0843373	0.00903614	0.060241	0.0512048	0.10241	0.0873494	0.00301205	0.0240964	0.0722892	9.03614	2.71084	2.10843	5.42169	1.20482	3.61446
ATCG00120	ATCG00120.1	507	0	48	29	16	18	1	38	39	41	2	46	51	19	11	12	16	36	31	0	18	35	0.0946746	0.0571992	0.0315582	0.035503	0.00197239	0.0749507	0.0769231	0.0808679	0.00394477	0.0907298	0.100592	0.0374753	0.0216963	0.0236686	0.0315582	0.0710059	0.061144	0	0.035503	0.0690335	9.46746	5.71992	3.15582	3.5503	0.197239	7.49507
ATCG00480	ATCG00480.1	498	0	40	27	22	23	1	19	36	47	4	30	49	24	15	18	26	26	36	0	12	43	0.0803213	0.0542169	0.0441767	0.0461847	0.00200803	0.0381526	0.0722892	0.0943775	0.00803213	0.060241	0.0983936	0.0481928	0.0301205	0.0361446	0.0522088	0.0522088	0.0722892	0	0.0240964	0.0863454	8.03213	5.42169	4.41767	4.61847	0.200803	3.81526
ATCG00490	ATCG00490.1	479	0	43	27	15	26	9	12	35	47	15	21	41	24	8	22	24	19	33	8	17	33	0.0897704	0.0563674	0.0313152	0.0542797	0.0187891	0.0250522	0.0730689	0.0981211	0.0313152	0.0438413	0.085595	0.0501044	0.0167015	0.045929	0.0501044	0.039666	0.0688935	0.0167015	0.0354906	0.0688935	8.97704	5.63674	3.13152	5.42797	1.87891	2.50522
																																												7.80128	4.77925	3.72977	5.69982	1.2764	3.20976
[truncated: 15 more columns]

## Sheet: Mooney-CompleteLeafData
SPOT	PROTEIN	ACCESSION	MOWSE	PROTEIN	GEL	MASSES	MASSES	PROTEIN	NORMALIZED	ARABIDOPSIS	AVG	PERCENT
NUMBER	NAME	NUMBER	SCORE	MW	MW	MATCHED	SUBMITTED	COVERAGE	VOLUME	GENE INDEX	PPM	MATCHED
1	lipoxygenase AtLOX2	17065070	5.69E+08	101963	112.8	17	75	0.21	2.01		35	0.22
2	unknown protein	16604476	3.30E+03	75055	112.5	8	75	0.11	0.61	At4g33010	5	0.08
3	lipoxygenase AtLOX2	17065070	5.44E+02	101963	112.8	8	29	0.18	0.55		6	0.28
4	hypothetical protein	15236576	5.23E+03	97742	110.7	12	75	0.11	0.17	At4g08720	85	0.1
5	hypothetical protein	15233658	1.58E+03	173348	110.4	13	34	0.06	0.37	At4g38070	71	0.38
6	ATP-dependent Clp protease ATP-binding subunit	18423214	2.88E+08	103453	105	16	75	0.23	0.5	At5g50920	96	0.15
7	heat shock protein 70	6746592	9.21E+03	77106	93	8	61	0.11	0.67		40	0.1
8	homocysteine S-methyltransferase	15238686	2.80E+06	84357	92.6	12	75	0.24	0.64	At5g17920	108	0.21
9	thioglucosidase/myrosinase/glucosyl hydrolase	15239563	3.86E+06	61133	92.2	11	75	0.2	0.29	At5g26000	40	0.17
10	homocysteine S-methyltransferase	15238686	1.61E+08	84357	90.5	15	75	0.29	0.75	At5g17920	51	0.31
11	luminal binding protein	1695717	9.29E+04	73623	90.1	9	70	0.18	1.13		41	0.07
12	kinesin-like protein	15229853	2.61E+06	138632	87.6	17	75	0.15	0.04	At3g44050	41	0.2
13	myrosinase precursor	16648811	2.05E+07	61107	84.3	16	75	0.3	7.2	At5g26000	93	0.3
14	ribulosebisphosphate carboxylase, large subunit	1944432	2.47E+05	47639	73.4	12	75	0.26	0.3		70	0.17
15	putative protein disulfide isomerase precursor	15219086	9.11E+03	55602	68	8	75	0.17	0.5	At1g21750	49	0.07
16	beta-glucosidase homolog	12229686	1.41E+09	60487	68	16	75	0.31	0.23	At1g52400	23	0.24
17	subtilisin-like serine protease	18405184	1.57E+04	87730	67.7	15	75	0.11	0.26	At2g39850	69	0.19
18	putative protein	15234390	1.62E+02	66377	64.7	4	75	0.1	0.77	At4g36390	38	0.02
19	thioglucosidase	1362007	8.87E+03	61354	64.1	7	46	0.13	0.09		38	0.13
20	thioglucosidase	1362007	1.54E+08	61354	63.5	16	75	0.33	0.15		59	0.28
21	unknown protein	18411523	2.88E+02	49388	61.2	5	42	0.11	0.36	At4g01050	93	0.19
22	thioglucosidase	13605680	3.10E+07	61355	61	16	75	0.29	0.22	At5g25980	41	0.27
23	ATPase alpha subunit	7525018	1.16E+08	55329	59.9	14	75	0.31	1.9		61	0.31
24	ATPase alpha subunit	7525018	7.79E+03	55239	59.7	9	45	0.22	0.21		3	0.48
25	vacuolar H+-ATPase subunit B, putative	15217907	2.86E+03	52052	58.9	7	50	0.16	0.06	At1g20260	29	0.11
26	tubulin beta-2/beta-3 chain	18424620	4.94E+02	50734	55.3	5	55	0.12	0.04	At5g62690	54	0.05
27	mitochondrial F1 ATP synthase beta subunit	18415909	6.30E+03	59671	55.1	7	66	0.15	0.01	At5g08670	97	0.05
28	ribulosebisphosphate carboxylase, large subunit	1944432	2.71E+02	47639	54.9	5	28	0.11	0.56		5	0.17
29	mitochondrial F1 ATP synthase beta subunit	18415909	4.61E+09	59671	54.7	17	55	0.38	0.8	At5g08670	9	0.25
30	ATPase beta subunit	7525040	7.75E+04	53934	54.3	11	47	0.29	0.46		93	0.17
31	large subunit of ribulose-1,5-bisphosphate carboxylase/oxy	7525041	3.26E+06	52955	53.4	16	75	0.34	2.5		103	0.38
32	ribulosebisphosphate carboxylase, large subunit	1944432	7.78E+05	47639	53.2	11	74	0.22	6.14		118	0.13
33	ATPase beta subunit	7525040	3.26E+10	53934	53	25	75	0.67	1.68		6	0.63
34	large subunit of riblose-1,5-bisphosphate carboxylase/oxyg	7525041	7.64E+06	52955	52.9	16	75	0.32	0.42		22	0.36
35	large subunit of riblose-1,5-bisphosphate carboxylase/oxyg	7525041	2.01E+08	52955	52.2	20	75	0.36	6		38	0.39
36	Similar to Arabidopsis luminal binding protein D89342	2342678	1.41E+04	73219	52	12	75	0.1	16.64		75	0.17
37	large subunit of riblose-1,5-bisphosphate carboxylase/oxyg	7525041	2.36E+09	52955	51.4	22	47	0.5	0.17		54	0.63
38	6-phosphogluconate dehydrogenase	15238151	4.52E+06	53318	50.6	14	75	0.34	0.2	At5g41670	44	0.23
39	putative argininosuccinate synthase	22328910	2.31E+03	53846	50.4	7	75	0.13	0.04	At4g24830	34	0.07
40	ribulosebisphosphate carboxylase, large subunit	1944432	3.92E+06	47639	49	12	54	0.25	0.1		89	0.19
41	ADP glucose pyrophosphorylase small subunit	1575754	1.17E+06	56599	48.9	11	75	0.25	0.06		53	0.1
42	putative cytochrome P450	18395978	6.76E+02	56460	48.8	6	30	0.17	0.05	At3g01900	60	0.15
43	eukaryotic translation initiation factor	19698881	7.49E+02	46691	48.5	8	75	0.22	0.17	At3g13920	24	0.11
44	myrosinase binding protein-like	12230212	3.41E+07	48497	48.3	7	75	0.45	0.21	At3g16470	91	0.18
45	ribulose-bisphosphate carboxylase activase	22326270	3.53E+04	49100	48	7	75	0.21	0.83	At2g39730	11	0.14
46	unknown	15228048	1.10E+03	42498	47.4	5	75	0.14	0.18	At2g36880	33	0.07
47	putative s-adenosylmethionine synthetase	15229033	3.93E+03	42796	47	7	50	0.18	0.12	At3g17390	30	0.19
48	hexokinase, putative	15220989	1.57E+02	53879	46.9	7	47	0.12	0.03	At1g47840	71	0.14
49	glutamine synthetase	15238559	2.99E+05	47411	46	12	75	0.27	0.32	At5g35630	119	0.37
50	unknown	18650600	2.81E+04	47740	45.9	8	75	0.17	0.23	At4g38220	46	0.05
51	elongation factor Tu	15237059	1.78E+04	51630	45.8	7	50	0.16	0.15	At4g20360	9	0.1
52	calmodulin-binding family protein	18401055	1.36E+02	60488	45.8	5	75	0.12	0.74	At2g26190	47	0.06
53	putative RNA helicase A	20197904	1.94E+02	71346	45.4	4	15	0.07	0.05	At2g01130	42	0.22
54	glutamine synthetase	15238559	1.74E+07	47411	45.3	15	75	0.44	0.84	At5g35630	127	0.42
55	phosphoglycerate kinase	2129669	9.19E+11	41907	45	18	75	0.63	0.6		48	0.43
56	monodehydroascorbate reductase -like protein	21592582	6.50E+04	46486	44.9	8	75	0.23	0.12		22	0.1
57	actin 2/7	15242516	9.69E+05	41736	44.8	15	75	0.57	0.51	At5g09810	23	0.48
58	actin 8	21592948	2.92E+07	41879	44.8	16	75	0.51	0.24		27	0.45
59	putative monogalactosyldiacylglycerol synthase	18397057	7.34E+02	52991	44.5	7	36	0.15	0.31	At2g11810	68	0.14
60	hypothetical protein	15222200	1.11E+03	46467	44.4	7	75	0.11	0.07	At1g06770	103	0.06
61	hypothetical protein	15224845	2.18E+03	45837	44.4	7	75	0.17	0.02	At2g44220	38	0.2
62	phosphoribulokinase/uridine kinase family protein	15222660	2.66E+06	76008	44.3	10	75	0.23	0.07	At1g26190	52	0.11
63	putative protein	15233094	1.22E+03	49459	44	9	75	0.21	0.29	At3g61390	65	0.18
64	glyceraldehyde 3-phosphate dehydrogenase B subunit	81621	3.48E+03	42796	43.9	7	46	0.18	0.92		16	0.1
65	zinc finger family protein	15222739	1.64E+03	51132	43.6	12	75	0.13	0.07	At1g26610	93	0.19
66	ribulose-bisphosphate carboxylase activase	22326270	3.53E+04	49100	43.3	7	75	0.21	0.21	At2g39730	14	0.09
67	formate dehydrogenase (FDH)	15241492	2.28E+06	42410	43.2	11	75	0.34	0.19	At5g14780	56	0.21
68	ribulose-bisphosphate carboxylase activase	22326270	3.63E+05	49100	43	8	75	0.26	1.25	At2g39730	78	0.13
69	contains similarity to pre-mRNA splicing factor	15239654	1.49E+02	44888	43	4	75	0.11	0.34	At5g54520	64	0.03
70	adenosine kinase 1 / adenosine 5'-phosphotransferase 1	15232763	6.71E+03	37836	42.8	6	75	0.22	0.08	At3g09820	32	0.07
71	expressed protein	15237296	2.20E+02	41013	41.9	4	75	0.11	0.26	At5g52890	64	0.04
72	branched-chain amino acid aminotransferase, putative	21617893	9.65E+02	38846	41.8	7	75	0.25	0.28		46	0.16
73	glutamine synthetase, cytosolic	15240288	3.27E+02	39115	41.8	4	16	0.11	0.17	At5g37600	50	0.14
74	similar to late embryogenesis abundant proteins	21592483	3.88E+03	35907	41.5	7	75	0.3	0.25		64	0.1
75	phosphoglycerate kinase, putative	15219412	1.57E+04	42132	41.5	6	75	0.22	0.34	At1g79550	24	0.1
76	fructose bisphosphate aldolase-like protein	15231715	5.70E+03	38540	41.5	5	75	0.19	0.66	At3g52930	19	0.04
77	glyceraldehyde-3-phosphate dehydrogenase, cytosolic	15229231	2.66E+07	36915	41	13	75	0.51	0.48	At3g04120	59	0.39
78	glyceraldehyde-3-phosphate dehydrogenase, cytosolic	81622	8.07E+05	36987	40.9	10	75	0.36	0.09		62	0.24
79	photosystem II stability/assembly factor HCF136	15237225	2.31E+08	44104	40.7	14	75	0.44	0.2	At5g23120	10	0.45
80	annexin	1429207	6.15E+10	35779	40.1	18	75	0.64	0.48		13	0.42
81	putative RNA binding protein	3850621	5.53E+08	42158	40	15	75	0.47	0.29		48	0.24
82	putative malate dehydrogenase, cytosolic	15219721	4.15E+05	35571	39.4	11	75	0.45	0.51	At1g04410	26	0.2
83	mRNA binding protein precursor-like	15229384	3.30E+07	43930	39.4	16	75	0.38	0.14	At3g63140	34	0.28
84	putative 1-aminocyclopropane-1-carboxylate oxidase	13877785	3.76E+04	36617	39.3	7	75	0.3	0.15	At1g05010	27	0.08
85	fructose-bisphosphate aldolase	14334740	4.68E+02	42889	39.2	5	19	0.21	1.37		4	0.48
86	fructose-bisphosphate aldolase	16226653	2.88E+04	42942	39.2	9	15	0.34	1.53	At4g38970	2	0.74
87	ATP synthase gamma chain, chloroplast precursor	5708095	1.09E+06	33325	39.1	11	75	0.38	0.6		32	0.28
88	unknown	21554971	2.78E+03	38601	38.6	4	63	0.12	1.81		21	0.07
89	nitrilase 1	22331584	7.04E+03	38152	38.3	6	75	0.17	0.17	At3g44310	57	0.06
90	chloroplast NAD-dependent malate dehydrogenase	15232820	3.01E+03	42406	37.5	5	75	0.16	0.16	At3g47520	9	0.05
91	plastidic glucose-6-phosphate dehydrogenase	3021305	1.81E+02	65497	37.5	7	72	0.12	0.02		9	0.11
92	cysteine synthase cpACS1, chloroplast	15224351	3.78E+05	41656	37.4	11	75	0.37	0.04	At2g43750	25	0.2
93	beta-1,3-glucanase 2	21554264	3.53E+05	37309	36.9	9	60	0.33	0.22		57	0.11
94	chloroplast lumen common family protein	18413971	1.23E+03	37263	36.7	7	75	0.18	0.12	At5g02590	82	0.07
95	putative signal recognition particle receptor, chloroplast	18406885	1.57E+05	39679	36.2	8	75	0.28	0.1	At2g45770	57	0.1
96	Expressed protein	18395257	6.51E+04	38601	36.2	7	75	0.22	0.17	At1g23560	59	0.11
97	uridylyltransferase-related	18394414	4.22E+03	31295	35.9	5	75	0.25	0.02	At1g16880	41	0.09
98	uridylyltransferase-related	18394414	1.21E+03	31295	35.9	5	75	0.2	0.04	At1g16880	50	0.08
99	similar to palmitoyl-protein thioesterase precursor-like	15236077	5.04E+02	34189	35.6	5	15	0.25	0.1	At4g17470	58	0.26
100	elongation factor 1-beta	13124717	1.73E+03	25132	35.3	8	45	0.45	0.04	At1g30230	31	0.25
101	33 kDa polypeptide of oxygen-evolving complex in photosy	15240013	2.02E+12	35143	33.4	20	34	0.64	1.45	At5g66570	110	0.79
102	elongation factor 1B alpha-subunit	18419934	1.06E+03	23988	33.2	4	75	0.23	0.05	At5g19510	10	0.04
103	carbonic anhydrase 2	18417463	5.30E+04	28345	33	8	75	0.42	0.21	At5g14740	41	0.15
104	zinc finger family protein	15232824	5.84E+03	31784	32.7	4	75	0.17	0.07	At3g47550	30	0.02
105	putative protein 1 photosystem II oxygen-evolving complex	15230324	8.36E+06	35020	32.6	10	34	0.45	0.62	At3g50820	55	0.23
106	hypothetical protein	15231908	2.21E+03	23540	32.2	10	75	0.23	0.79	At3g14700	80	0.07
107	vegetative storage protein	2373399	2.49E+06	29825	30.7	9	75	0.36	0.42		34	0.13
108	putative protein	18421042	2.84E+02	38676	29.9	5	75	0.13	0.48	At5g26770	84	0.03
109	chlorophyll a/b binding protein	16374	1.29E+02	24995	29.1	4	59	0.12	2.32		10	0.11
110	carbonic anhydrase	20259533	1.38E+04	29504	28.5	6	27	0.18	1.03		4	0.39
111	unknown	21555032	5.69E+03	21243	28	5	75	0.26	0.77		33	0.04
112	glutathione S-transferase, putative	15235401	1.43E+05	24129	27.9	9	75	0.38	0.56	At4g02520	48	0.08
113	glutathione S-transferase, putative	18411929	4.75E+05	25651	27.8	11	75	0.35	0.45	At1g78380	49	0.21
114	glutathione S-transferase 11 (GST class phi)	17377644	2.60E+04	23554	27.7	10	75	0.44	1.18	At1g02920	35	0.2
115	glutathione S transferase	15235401	5.98E+03	24129	27.6	9	50	0.35	0.11	At4g02520	3	0.36
116	23 kDa polypeptide of oxygen-evolving comlex	15222166	1.43E+04	28095	27.5	8	30	0.48	1.97	At1g06680	41	0.55
117	GSH-dependent dehydroascorbate reductase 1, putative	15223576	8.08E+06	23641	27	8	75	0.53	1	At1g19570	77	0.24
118	glutathione S-transferase 6 (GST class phi)	12643792	1.29E+06	24077	26.4	10	75	0.62	0.69	At2g47730	40	0.18
119	2-cys peroxiredoxin, chloroplast	15229806	3.89E+06	29092	26	7	75	0.44	0.49	At3g11630	5	0.35
120	mitochondrial F0 ATP synthase D chain	17939851	5.79E+03	17179	22.7	7	75	0.41	0.09		52	0.07
121	putative methylenetetrahydrofolate reductase	13877629	2.95E+04	66843	22	10	75	0.14	0.07	At2g44160	63	0.09
122	putative copper/zinc superoxide dismutase	11358868	2.77E+02	22175	21.7	4	55	0.4	0.39		13	0.16
123	unknown	15218951	5.49E+02	15664	20.9	7	75	0.14	0.59	At1g29500	47	0.06
124	unnamed protein product	9279745	1.25E+03	21266	19.5	5	75	0.25	0.14		55	0.05
125	glycine-rich RNA binding protein 7	21553354	1.39E+04	16889	17.9	8	75	0.53	0.19		30	0.15
126	glycine-rich RNA-binding protein 8	15235002	4.36E+04	16579	17.2	9	75	0.63	0.05	At4g39260	60	0.27
127	ribulose bisphosphate carboxylase small chain 3B	15240901	5.34E+05	20285	13.1	9	19	0.6	3.88	At5g38410	7	1.07
128	ribulose bisphosphate carboxylase small unit, putative	13926229	1.52E+07	14699	12.1	11	24	0.72	4.16		37	0.86
									100.04
